# Supplementary material for: Plasma Circulating mRNA Profile for the Non-Invasive Diagnosis of Colorectal Cancer Using NanoString Technologies
Source: MDPI journal article supplement (doi:10.3390/ijms25053012), 2024-03-05
Supplement: s1 [file s1]

**Supplementary Table S2.** Results of Mann-Whitney U test for significant differences between two groups. Differentially expressed RNAs upregulated in the plasma of CRC patients. However, no statistically significance in gene expression was observed in plasma among different stages of CRC.

| Gene Name    | Refseq         | Group A   | Group A Average | Group B   | Group B Average | p-value  | adjusted p-value* |
|--------------|----------------|-----------|-----------------|-----------|-----------------|----------|-------------------|
| <i>BANK1</i> | NM_001083907.1 | Stage I   | 3118.818        | Stage II  | 3773.453        | 0.442617 | 0.484939          |
| <i>BANK1</i> | NM_001083907.1 | Stage I   | 3118.818        | Stage III | 3697.386        | 0.277144 | 0.41123           |
| <i>BANK1</i> | NM_001083907.1 | Stage I   | 3118.818        | Stage IV  | 944.5667        | 0.082167 | 0.211506          |
| <i>BANK1</i> | NM_001083907.1 | Stage I   | 3118.818        | Normal    | 169.1133        | 0.003381 | 0.019106          |
| <i>BANK1</i> | NM_001083907.1 | Stage I   | 3118.818        | No stage  | 1436.398        | 0.156161 | 0.289552          |
| <i>BANK1</i> | NM_001083907.1 | Stage II  | 3773.453        | Stage I   | 3118.818        | 0.442617 | 0.484939          |
| <i>BANK1</i> | NM_001083907.1 | Stage II  | 3773.453        | Stage III | 3697.386        | 0.230239 | 0.371082          |
| <i>BANK1</i> | NM_001083907.1 | Stage II  | 3773.453        | Stage IV  | 944.5667        | 0.198033 | 0.338255          |
| <i>BANK1</i> | NM_001083907.1 | Stage II  | 3773.453        | Normal    | 169.1133        | 0.000762 | 0.006719          |
| <i>BANK1</i> | NM_001083907.1 | Stage II  | 3773.453        | No stage  | 1436.398        | 0.442617 | 0.484939          |
| <i>BANK1</i> | NM_001083907.1 | Stage III | 3697.386        | Stage I   | 3118.818        | 0.277144 | 0.41123           |
| <i>BANK1</i> | NM_001083907.1 | Stage III | 3697.386        | Stage II  | 3773.453        | 0.230239 | 0.371082          |
| <i>BANK1</i> | NM_001083907.1 | Stage III | 3697.386        | Stage IV  | 944.5667        | 0.449013 | 0.490644          |

|              |                |           |          |           |          |          |          |
|--------------|----------------|-----------|----------|-----------|----------|----------|----------|
| <i>BANK1</i> | NM_001083907.1 | Stage III | 3697.386 | Normal    | 169.1133 | 0.000127 | 0.001665 |
| <i>BANK1</i> | NM_001083907.1 | Stage III | 3697.386 | No stage  | 1436.398 | 0.248564 | 0.382852 |
| <i>BANK1</i> | NM_001083907.1 | Stage IV  | 944.5667 | Stage I   | 3118.818 | 0.082167 | 0.211506 |
| <i>BANK1</i> | NM_001083907.1 | Stage IV  | 944.5667 | Stage II  | 3773.453 | 0.198033 | 0.338255 |
| <i>BANK1</i> | NM_001083907.1 | Stage IV  | 944.5667 | Stage III | 3697.386 | 0.449013 | 0.490644 |
| <i>BANK1</i> | NM_001083907.1 | Stage IV  | 944.5667 | Normal    | 169.1133 | 0.000621 | 0.005824 |
| <i>BANK1</i> | NM_001083907.1 | Stage IV  | 944.5667 | No stage  | 1436.398 | 0.198033 | 0.338255 |
| <i>BANK1</i> | NM_001083907.1 | Normal    | 169.1133 | Stage I   | 3118.818 | 0.003381 | 0.019106 |
| <i>BANK1</i> | NM_001083907.1 | Normal    | 169.1133 | Stage II  | 3773.453 | 0.000762 | 0.006719 |
| <i>BANK1</i> | NM_001083907.1 | Normal    | 169.1133 | Stage III | 3697.386 | 0.000127 | 0.001665 |
| <i>BANK1</i> | NM_001083907.1 | Normal    | 169.1133 | Stage IV  | 944.5667 | 0.000621 | 0.005824 |
| <i>BANK1</i> | NM_001083907.1 | Normal    | 169.1133 | No stage  | 1436.398 | 0.002019 | 0.01298  |
| <i>BANK1</i> | NM_001083907.1 | No stage  | 1436.398 | Stage I   | 3118.818 | 0.156161 | 0.289552 |
| <i>BANK1</i> | NM_001083907.1 | No stage  | 1436.398 | Stage II  | 3773.453 | 0.442617 | 0.484939 |
| <i>BANK1</i> | NM_001083907.1 | No stage  | 1436.398 | Stage III | 3697.386 | 0.248564 | 0.382852 |
| <i>BANK1</i> | NM_001083907.1 | No stage  | 1436.398 | Stage IV  | 944.5667 | 0.198033 | 0.338255 |
| <i>BANK1</i> | NM_001083907.1 | No stage  | 1436.398 | Normal    | 169.1133 | 0.002019 | 0.01298  |
| <i>BGN</i>   | NM_001711.3    | Stage I   | 103.0225 | Stage II  | 191.175  | 0.235243 | 0.371082 |
| <i>BGN</i>   | NM_001711.3    | Stage I   | 103.0225 | Stage III | 149.2763 | 0.464351 | 0.490662 |
| <i>BGN</i>   | NM_001711.3    | Stage I   | 103.0225 | Stage IV  | 123.5811 | 0.468372 | 0.490662 |
| <i>BGN</i>   | NM_001711.3    | Stage I   | 103.0225 | Normal    | 20       | 0.000926 | 0.00688  |
| <i>BGN</i>   | NM_001711.3    | Stage I   | 103.0225 | No stage  | 92.56    | 0.5      | 0.5      |

|            |             |           |          |           |          |          |          |
|------------|-------------|-----------|----------|-----------|----------|----------|----------|
| <i>BGN</i> | NM_001711.3 | Stage II  | 191.175  | Stage I   | 103.0225 | 0.235243 | 0.371082 |
| <i>BGN</i> | NM_001711.3 | Stage II  | 191.175  | Stage III | 149.2763 | 0.14916  | 0.289552 |
| <i>BGN</i> | NM_001711.3 | Stage II  | 191.175  | Stage IV  | 123.5811 | 0.154567 | 0.289552 |
| <i>BGN</i> | NM_001711.3 | Stage II  | 191.175  | Normal    | 20       | 9.06E-05 | 0.001384 |
| <i>BGN</i> | NM_001711.3 | Stage II  | 191.175  | No stage  | 92.56    | 0.235243 | 0.371082 |
| <i>BGN</i> | NM_001711.3 | Stage III | 149.2763 | Stage I   | 103.0225 | 0.464351 | 0.490662 |
| <i>BGN</i> | NM_001711.3 | Stage III | 149.2763 | Stage II  | 191.175  | 0.14916  | 0.289552 |
| <i>BGN</i> | NM_001711.3 | Stage III | 149.2763 | Stage IV  | 123.5811 | 0.354855 | 0.455296 |
| <i>BGN</i> | NM_001711.3 | Stage III | 149.2763 | Normal    | 20       | 0.000103 | 0.001459 |
| <i>BGN</i> | NM_001711.3 | Stage III | 149.2763 | No stage  | 92.56    | 0.349106 | 0.450864 |
| <i>BGN</i> | NM_001711.3 | Stage IV  | 123.5811 | Stage I   | 103.0225 | 0.468372 | 0.490662 |
| <i>BGN</i> | NM_001711.3 | Stage IV  | 123.5811 | Stage II  | 191.175  | 0.154567 | 0.289552 |
| <i>BGN</i> | NM_001711.3 | Stage IV  | 123.5811 | Stage III | 149.2763 | 0.354855 | 0.455296 |
| <i>BGN</i> | NM_001711.3 | Stage IV  | 123.5811 | Normal    | 20       | 0.002512 | 0.01502  |
| <i>BGN</i> | NM_001711.3 | Stage IV  | 123.5811 | No stage  | 92.56    | 0.468372 | 0.490662 |
| <i>BGN</i> | NM_001711.3 | Normal    | 20       | Stage I   | 103.0225 | 0.000926 | 0.00688  |
| <i>BGN</i> | NM_001711.3 | Normal    | 20       | Stage II  | 191.175  | 9.06E-05 | 0.001384 |
| <i>BGN</i> | NM_001711.3 | Normal    | 20       | Stage III | 149.2763 | 0.000103 | 0.001459 |
| <i>BGN</i> | NM_001711.3 | Normal    | 20       | Stage IV  | 123.5811 | 0.002512 | 0.01502  |
| <i>BGN</i> | NM_001711.3 | Normal    | 20       | No stage  | 92.56    | 0.000926 | 0.00688  |
| <i>BGN</i> | NM_001711.3 | No stage  | 92.56    | Stage I   | 103.0225 | 0.5      | 0.5      |
| <i>BGN</i> | NM_001711.3 | No stage  | 92.56    | Stage II  | 191.175  | 0.235243 | 0.371082 |

|            |             |           |          |           |          |          |          |
|------------|-------------|-----------|----------|-----------|----------|----------|----------|
| <i>BGN</i> | NM_001711.3 | No stage  | 92.56    | Stage III | 149.2763 | 0.349106 | 0.450864 |
| <i>BGN</i> | NM_001711.3 | No stage  | 92.56    | Stage IV  | 123.5811 | 0.468372 | 0.490662 |
| <i>BGN</i> | NM_001711.3 | No stage  | 92.56    | Normal    | 20       | 0.000926 | 0.00688  |
| <i>CDA</i> | NM_001785.2 | Stage I   | 82333    | Stage II  | 133665.2 | 0.235243 | 0.371082 |
| <i>CDA</i> | NM_001785.2 | Stage I   | 82333    | Stage III | 79813.29 | 0.488248 | 0.497289 |
| <i>CDA</i> | NM_001785.2 | Stage I   | 82333    | Stage IV  | 30877.19 | 0.176939 | 0.318722 |
| <i>CDA</i> | NM_001785.2 | Stage I   | 82333    | Normal    | 41917.4  | 0.180833 | 0.322218 |
| <i>CDA</i> | NM_001785.2 | Stage I   | 82333    | No stage  | 51437.12 | 0.235243 | 0.371082 |
| <i>CDA</i> | NM_001785.2 | Stage II  | 133665.2 | Stage I   | 82333    | 0.235243 | 0.371082 |
| <i>CDA</i> | NM_001785.2 | Stage II  | 133665.2 | Stage III | 79813.29 | 0.066471 | 0.187162 |
| <i>CDA</i> | NM_001785.2 | Stage II  | 133665.2 | Stage IV  | 30877.19 | 0.018621 | 0.080432 |
| <i>CDA</i> | NM_001785.2 | Stage II  | 133665.2 | Normal    | 41917.4  | 0.029984 | 0.1195   |
| <i>CDA</i> | NM_001785.2 | Stage II  | 133665.2 | No stage  | 51437.12 | 0.156161 | 0.289552 |
| <i>CDA</i> | NM_001785.2 | Stage III | 79813.29 | Stage I   | 82333    | 0.488248 | 0.497289 |
| <i>CDA</i> | NM_001785.2 | Stage III | 79813.29 | Stage II  | 133665.2 | 0.066471 | 0.187162 |
| <i>CDA</i> | NM_001785.2 | Stage III | 79813.29 | Stage IV  | 30877.19 | 0.009691 | 0.047306 |
| <i>CDA</i> | NM_001785.2 | Stage III | 79813.29 | Normal    | 41917.4  | 0.030639 | 0.119798 |
| <i>CDA</i> | NM_001785.2 | Stage III | 79813.29 | No stage  | 51437.12 | 0.329266 | 0.441731 |
| <i>CDA</i> | NM_001785.2 | Stage IV  | 30877.19 | Stage I   | 82333    | 0.176939 | 0.318722 |
| <i>CDA</i> | NM_001785.2 | Stage IV  | 30877.19 | Stage II  | 133665.2 | 0.018621 | 0.080432 |
| <i>CDA</i> | NM_001785.2 | Stage IV  | 30877.19 | Stage III | 79813.29 | 0.009691 | 0.047306 |
| <i>CDA</i> | NM_001785.2 | Stage IV  | 30877.19 | Normal    | 41917.4  | 0.296776 | 0.427555 |

|                        |             |           |          |           |          |          |          |
|------------------------|-------------|-----------|----------|-----------|----------|----------|----------|
| <i>CDA</i>             | NM_001785.2 | Stage IV  | 30877.19 | No stage  | 51437.12 | 0.157937 | 0.289552 |
| <i>CDA</i>             | NM_001785.2 | Normal    | 41917.4  | Stage I   | 82333    | 0.180833 | 0.322218 |
| <i>CDA</i>             | NM_001785.2 | Normal    | 41917.4  | Stage II  | 133665.2 | 0.029984 | 0.1195   |
| <i>CDA</i>             | NM_001785.2 | Normal    | 41917.4  | Stage III | 79813.29 | 0.030639 | 0.119798 |
| <i>CDA</i>             | NM_001785.2 | Normal    | 41917.4  | Stage IV  | 30877.19 | 0.296776 | 0.427555 |
| <i>CDA</i>             | NM_001785.2 | Normal    | 41917.4  | No stage  | 51437.12 | 0.215108 | 0.35733  |
| <i>CDA</i>             | NM_001785.2 | No stage  | 51437.12 | Stage I   | 82333    | 0.235243 | 0.371082 |
| <i>CDA</i>             | NM_001785.2 | No stage  | 51437.12 | Stage II  | 133665.2 | 0.156161 | 0.289552 |
| <i>CDA</i>             | NM_001785.2 | No stage  | 51437.12 | Stage III | 79813.29 | 0.329266 | 0.441731 |
| <i>CDA</i>             | NM_001785.2 | No stage  | 51437.12 | Stage IV  | 30877.19 | 0.157937 | 0.289552 |
| <i>CDA</i>             | NM_001785.2 | No stage  | 51437.12 | Normal    | 41917.4  | 0.215108 | 0.35733  |
| <i>CEACAM7 exon1-2</i> | NM_006890.4 | Stage I   | 46.1025  | Stage II  | 51.425   | 0.442275 | 0.484939 |
| <i>CEACAM7 exon1-2</i> | NM_006890.4 | Stage I   | 46.1025  | Stage III | 13521.77 | 0.361457 | 0.462329 |
| <i>CEACAM7 exon1-2</i> | NM_006890.4 | Stage I   | 46.1025  | Stage IV  | 28.64333 | 0.110283 | 0.242623 |
| <i>CEACAM7 exon1-2</i> | NM_006890.4 | Stage I   | 46.1025  | Normal    | 20       | 0.007667 | 0.038567 |
| <i>CEACAM7 exon1-2</i> | NM_006890.4 | Stage I   | 46.1025  | No stage  | 25.2075  | 0.204176 | 0.345883 |
| <i>CEACAM7 exon1-2</i> | NM_006890.4 | Stage II  | 51.425   | Stage I   | 46.1025  | 0.442275 | 0.484939 |
| <i>CEACAM7 exon1-2</i> | NM_006890.4 | Stage II  | 51.425   | Stage III | 13521.77 | 0.070749 | 0.191712 |
| <i>CEACAM7 exon1-2</i> | NM_006890.4 | Stage II  | 51.425   | Stage IV  | 28.64333 | 0.026861 | 0.109775 |
| <i>CEACAM7 exon1-2</i> | NM_006890.4 | Stage II  | 51.425   | Normal    | 20       | 9.06E-05 | 0.001384 |
| <i>CEACAM7 exon1-2</i> | NM_006890.4 | Stage II  | 51.425   | No stage  | 25.2075  | 0.027257 | 0.110774 |
| <i>CEACAM7 exon1-2</i> | NM_006890.4 | Stage III | 13521.77 | Stage I   | 46.1025  | 0.361457 | 0.462329 |

|                        |             |           |          |           |          |          |          |
|------------------------|-------------|-----------|----------|-----------|----------|----------|----------|
| <i>CEACAM7 exon1-2</i> | NM_006890.4 | Stage III | 13521.77 | Stage II  | 51.425   | 0.070749 | 0.191712 |
| <i>CEACAM7 exon1-2</i> | NM_006890.4 | Stage III | 13521.77 | Stage IV  | 28.64333 | 0.118017 | 0.255549 |
| <i>CEACAM7 exon1-2</i> | NM_006890.4 | Stage III | 13521.77 | Normal    | 20       | 0.003894 | 0.021705 |
| <i>CEACAM7 exon1-2</i> | NM_006890.4 | Stage III | 13521.77 | No stage  | 25.2075  | 0.215264 | 0.35733  |
| <i>CEACAM7 exon1-2</i> | NM_006890.4 | Stage IV  | 28.64333 | Stage I   | 46.1025  | 0.110283 | 0.242623 |
| <i>CEACAM7 exon1-2</i> | NM_006890.4 | Stage IV  | 28.64333 | Stage II  | 51.425   | 0.026861 | 0.109775 |
| <i>CEACAM7 exon1-2</i> | NM_006890.4 | Stage IV  | 28.64333 | Stage III | 13521.77 | 0.118017 | 0.255549 |
| <i>CEACAM7 exon1-2</i> | NM_006890.4 | Stage IV  | 28.64333 | Normal    | 20       | 0.054401 | 0.169761 |
| <i>CEACAM7 exon1-2</i> | NM_006890.4 | Stage IV  | 28.64333 | No stage  | 25.2075  | 0.5      | 0.5      |
| <i>CEACAM7 exon1-2</i> | NM_006890.4 | Normal    | 20       | Stage I   | 46.1025  | 0.007667 | 0.038567 |
| <i>CEACAM7 exon1-2</i> | NM_006890.4 | Normal    | 20       | Stage II  | 51.425   | 9.06E-05 | 0.001384 |
| <i>CEACAM7 exon1-2</i> | NM_006890.4 | Normal    | 20       | Stage III | 13521.77 | 0.003894 | 0.021705 |
| <i>CEACAM7 exon1-2</i> | NM_006890.4 | Normal    | 20       | Stage IV  | 28.64333 | 0.054401 | 0.169761 |
| <i>CEACAM7 exon1-2</i> | NM_006890.4 | Normal    | 20       | No stage  | 25.2075  | 0.056176 | 0.169761 |
| <i>CEACAM7 exon1-2</i> | NM_006890.4 | No stage  | 25.2075  | Stage I   | 46.1025  | 0.204176 | 0.345883 |
| <i>CEACAM7 exon1-2</i> | NM_006890.4 | No stage  | 25.2075  | Stage II  | 51.425   | 0.027257 | 0.110774 |
| <i>CEACAM7 exon1-2</i> | NM_006890.4 | No stage  | 25.2075  | Stage III | 13521.77 | 0.215264 | 0.35733  |
| <i>CEACAM7 exon1-2</i> | NM_006890.4 | No stage  | 25.2075  | Stage IV  | 28.64333 | 0.5      | 0.5      |
| <i>CEACAM7 exon1-2</i> | NM_006890.4 | No stage  | 25.2075  | Normal    | 20       | 0.056176 | 0.169761 |
| <i>CEMIP</i>           | NM_018689.1 | Stage I   | 47200.59 | Stage II  | 59372.89 | 0.156161 | 0.289552 |
| <i>CEMIP</i>           | NM_018689.1 | Stage I   | 47200.59 | Stage III | 23834.92 | 0.429596 | 0.484939 |
| <i>CEMIP</i>           | NM_018689.1 | Stage I   | 47200.59 | Stage IV  | 18151.22 | 0.319391 | 0.441731 |

|              |             |           |          |           |          |          |          |
|--------------|-------------|-----------|----------|-----------|----------|----------|----------|
| <i>CEMIP</i> | NM_018689.1 | Stage I   | 47200.59 | Normal    | 4046.548 | 0.081739 | 0.211506 |
| <i>CEMIP</i> | NM_018689.1 | Stage I   | 47200.59 | No stage  | 105721   | 0.5      | 0.5      |
| <i>CEMIP</i> | NM_018689.1 | Stage II  | 59372.89 | Stage I   | 47200.59 | 0.156161 | 0.289552 |
| <i>CEMIP</i> | NM_018689.1 | Stage II  | 59372.89 | Stage III | 23834.92 | 0.092005 | 0.219168 |
| <i>CEMIP</i> | NM_018689.1 | Stage II  | 59372.89 | Stage IV  | 18151.22 | 0.07024  | 0.191712 |
| <i>CEMIP</i> | NM_018689.1 | Stage II  | 59372.89 | Normal    | 4046.548 | 0.003077 | 0.017509 |
| <i>CEMIP</i> | NM_018689.1 | Stage II  | 59372.89 | No stage  | 105721   | 0.235243 | 0.371082 |
| <i>CEMIP</i> | NM_018689.1 | Stage III | 23834.92 | Stage I   | 47200.59 | 0.429596 | 0.484939 |
| <i>CEMIP</i> | NM_018689.1 | Stage III | 23834.92 | Stage II  | 59372.89 | 0.092005 | 0.219168 |
| <i>CEMIP</i> | NM_018689.1 | Stage III | 23834.92 | Stage IV  | 18151.22 | 0.405646 | 0.484939 |
| <i>CEMIP</i> | NM_018689.1 | Stage III | 23834.92 | Normal    | 4046.548 | 0.002077 | 0.01298  |
| <i>CEMIP</i> | NM_018689.1 | Stage III | 23834.92 | No stage  | 105721   | 0.452927 | 0.490662 |
| <i>CEMIP</i> | NM_018689.1 | Stage IV  | 18151.22 | Stage I   | 47200.59 | 0.319391 | 0.441731 |
| <i>CEMIP</i> | NM_018689.1 | Stage IV  | 18151.22 | Stage II  | 59372.89 | 0.07024  | 0.191712 |
| <i>CEMIP</i> | NM_018689.1 | Stage IV  | 18151.22 | Stage III | 23834.92 | 0.405646 | 0.484939 |
| <i>CEMIP</i> | NM_018689.1 | Stage IV  | 18151.22 | Normal    | 4046.548 | 0.049078 | 0.164591 |
| <i>CEMIP</i> | NM_018689.1 | Stage IV  | 18151.22 | No stage  | 105721   | 0.437832 | 0.484939 |
| <i>CEMIP</i> | NM_018689.1 | Normal    | 4046.548 | Stage I   | 47200.59 | 0.081739 | 0.211506 |
| <i>CEMIP</i> | NM_018689.1 | Normal    | 4046.548 | Stage II  | 59372.89 | 0.003077 | 0.017509 |
| <i>CEMIP</i> | NM_018689.1 | Normal    | 4046.548 | Stage III | 23834.92 | 0.002077 | 0.01298  |
| <i>CEMIP</i> | NM_018689.1 | Normal    | 4046.548 | Stage IV  | 18151.22 | 0.049078 | 0.164591 |
| <i>CEMIP</i> | NM_018689.1 | Normal    | 4046.548 | No stage  | 105721   | 0.047246 | 0.160405 |

|                       |                |           |          |           |          |          |          |
|-----------------------|----------------|-----------|----------|-----------|----------|----------|----------|
| <i>CEMIP</i>          | NM_018689.1    | No stage  | 105721   | Stage I   | 47200.59 | 0.5      | 0.5      |
| <i>CEMIP</i>          | NM_018689.1    | No stage  | 105721   | Stage II  | 59372.89 | 0.235243 | 0.371082 |
| <i>CEMIP</i>          | NM_018689.1    | No stage  | 105721   | Stage III | 23834.92 | 0.452927 | 0.490662 |
| <i>CEMIP</i>          | NM_018689.1    | No stage  | 105721   | Stage IV  | 18151.22 | 0.437832 | 0.484939 |
| <i>CEMIP</i>          | NM_018689.1    | No stage  | 105721   | Normal    | 4046.548 | 0.047246 | 0.160405 |
| <i>CTNNB1 exon1-2</i> | NM_001098210.1 | Stage I   | 15716.63 | Stage II  | 36968.89 | 0.056176 | 0.169761 |
| <i>CTNNB1 exon1-2</i> | NM_001098210.1 | Stage I   | 15716.63 | Stage III | 25861.48 | 0.329266 | 0.441731 |
| <i>CTNNB1 exon1-2</i> | NM_001098210.1 | Stage I   | 15716.63 | Stage IV  | 19006.47 | 0.438602 | 0.484939 |
| <i>CTNNB1 exon1-2</i> | NM_001098210.1 | Stage I   | 15716.63 | Normal    | 8143.892 | 0.067565 | 0.189596 |
| <i>CTNNB1 exon1-2</i> | NM_001098210.1 | Stage I   | 15716.63 | No stage  | 19110.33 | 0.442617 | 0.484939 |
| <i>CTNNB1 exon1-2</i> | NM_001098210.1 | Stage II  | 36968.89 | Stage I   | 15716.63 | 0.056176 | 0.169761 |
| <i>CTNNB1 exon1-2</i> | NM_001098210.1 | Stage II  | 36968.89 | Stage III | 25861.48 | 0.083064 | 0.211506 |
| <i>CTNNB1 exon1-2</i> | NM_001098210.1 | Stage II  | 36968.89 | Stage IV  | 19006.47 | 0.052596 | 0.1695   |
| <i>CTNNB1 exon1-2</i> | NM_001098210.1 | Stage II  | 36968.89 | Normal    | 8143.892 | 0.00191  | 0.012606 |
| <i>CTNNB1 exon1-2</i> | NM_001098210.1 | Stage II  | 36968.89 | No stage  | 19110.33 | 0.056176 | 0.169761 |
| <i>CTNNB1 exon1-2</i> | NM_001098210.1 | Stage III | 25861.48 | Stage I   | 15716.63 | 0.329266 | 0.441731 |
| <i>CTNNB1 exon1-2</i> | NM_001098210.1 | Stage III | 25861.48 | Stage II  | 36968.89 | 0.083064 | 0.211506 |
| <i>CTNNB1 exon1-2</i> | NM_001098210.1 | Stage III | 25861.48 | Stage IV  | 19006.47 | 0.12119  | 0.257458 |
| <i>CTNNB1 exon1-2</i> | NM_001098210.1 | Stage III | 25861.48 | Normal    | 8143.892 | 0.000382 | 0.003985 |
| <i>CTNNB1 exon1-2</i> | NM_001098210.1 | Stage III | 25861.48 | No stage  | 19110.33 | 0.395441 | 0.484939 |
| <i>CTNNB1 exon1-2</i> | NM_001098210.1 | Stage IV  | 19006.47 | Stage I   | 15716.63 | 0.438602 | 0.484939 |
| <i>CTNNB1 exon1-2</i> | NM_001098210.1 | Stage IV  | 19006.47 | Stage II  | 36968.89 | 0.052596 | 0.1695   |



|                       |                |          |          |           |          |          |          |
|-----------------------|----------------|----------|----------|-----------|----------|----------|----------|
| <i>CTNNB1 exon1-2</i> | NM_001098210.1 | Stage IV | 19006.47 | Stage III | 25861.48 | 0.12119  | 0.257458 |
| <i>CTNNB1 exon1-2</i> | NM_001098210.1 | Stage IV | 19006.47 | Normal    | 8143.892 | 0.042235 | 0.150187 |
| <i>CTNNB1 exon1-2</i> | NM_001098210.1 | Stage IV | 19006.47 | No stage  | 19110.33 | 0.469251 | 0.490662 |
| <i>CTNNB1 exon1-2</i> | NM_001098210.1 | Normal   | 8143.892 | Stage I   | 15716.63 | 0.067565 | 0.189596 |
| <i>CTNNB1 exon1-2</i> | NM_001098210.1 | Normal   | 8143.892 | Stage II  | 36968.89 | 0.00191  | 0.012606 |
| <i>CTNNB1 exon1-2</i> | NM_001098210.1 | Normal   | 8143.892 | Stage III | 25861.48 | 0.000382 | 0.003985 |
| <i>CTNNB1 exon1-2</i> | NM_001098210.1 | Normal   | 8143.892 | Stage IV  | 19006.47 | 0.042235 | 0.150187 |
| <i>CTNNB1 exon1-2</i> | NM_001098210.1 | Normal   | 8143.892 | No stage  | 19110.33 | 0.037145 | 0.140222 |
| <i>CTNNB1 exon1-2</i> | NM_001098210.1 | No stage | 19110.33 | Stage I   | 15716.63 | 0.442617 | 0.484939 |
| <i>CTNNB1 exon1-2</i> | NM_001098210.1 | No stage | 19110.33 | Stage II  | 36968.89 | 0.056176 | 0.169761 |
| <i>CTNNB1 exon1-2</i> | NM_001098210.1 | No stage | 19110.33 | Stage III | 25861.48 | 0.395441 | 0.484939 |
| <i>CTNNB1 exon1-2</i> | NM_001098210.1 | No stage | 19110.33 | Stage IV  | 19006.47 | 0.469251 | 0.490662 |
| <i>CTNNB1 exon1-2</i> | NM_001098210.1 | No stage | 19110.33 | Normal    | 8143.892 | 0.037145 | 0.140222 |
| <i>CTSL</i>           | NM_001912.4    | Stage I  | 26001.42 | Stage II  | 36041.48 | 0.235243 | 0.371082 |
| <i>CTSL</i>           | NM_001912.4    | Stage I  | 26001.42 | Stage III | 22480.74 | 0.307876 | 0.438434 |
| <i>CTSL</i>           | NM_001912.4    | Stage I  | 26001.42 | Stage IV  | 15920.57 | 0.176939 | 0.318722 |
| <i>CTSL</i>           | NM_001912.4    | Stage I  | 26001.42 | Normal    | 3366.493 | 0.033209 | 0.129234 |
| <i>CTSL</i>           | NM_001912.4    | Stage I  | 26001.42 | No stage  | 26612.48 | 0.442617 | 0.484939 |
| <i>CTSL</i>           | NM_001912.4    | Stage II | 36041.48 | Stage I   | 26001.42 | 0.235243 | 0.371082 |
| <i>CTSL</i>           | NM_001912.4    | Stage II | 36041.48 | Stage III | 22480.74 | 0.07421  | 0.196229 |
| <i>CTSL</i>           | NM_001912.4    | Stage II | 36041.48 | Stage IV  | 15920.57 | 0.037991 | 0.140222 |
| <i>CTSL</i>           | NM_001912.4    | Stage II | 36041.48 | Normal    | 3366.493 | 0.001716 | 0.011898 |

|              |             |           |          |           |          |          |          |
|--------------|-------------|-----------|----------|-----------|----------|----------|----------|
| <i>CTSL</i>  | NM_001912.4 | Stage II  | 36041.48 | No stage  | 26612.48 | 0.332503 | 0.441731 |
| <i>CTSL</i>  | NM_001912.4 | Stage III | 22480.74 | Stage I   | 26001.42 | 0.307876 | 0.438434 |
| <i>CTSL</i>  | NM_001912.4 | Stage III | 22480.74 | Stage II  | 36041.48 | 0.07421  | 0.196229 |
| <i>CTSL</i>  | NM_001912.4 | Stage III | 22480.74 | Stage IV  | 15920.57 | 0.210478 | 0.35488  |
| <i>CTSL</i>  | NM_001912.4 | Stage III | 22480.74 | Normal    | 3366.493 | 0.000747 | 0.006719 |
| <i>CTSL</i>  | NM_001912.4 | Stage III | 22480.74 | No stage  | 26612.48 | 0.329104 | 0.441731 |
| <i>CTSL</i>  | NM_001912.4 | Stage IV  | 15920.57 | Stage I   | 26001.42 | 0.176939 | 0.318722 |
| <i>CTSL</i>  | NM_001912.4 | Stage IV  | 15920.57 | Stage II  | 36041.48 | 0.037991 | 0.140222 |
| <i>CTSL</i>  | NM_001912.4 | Stage IV  | 15920.57 | Stage III | 22480.74 | 0.210478 | 0.35488  |
| <i>CTSL</i>  | NM_001912.4 | Stage IV  | 15920.57 | Normal    | 3366.493 | 0.01362  | 0.063844 |
| <i>CTSL</i>  | NM_001912.4 | Stage IV  | 15920.57 | No stage  | 26612.48 | 0.157937 | 0.289552 |
| <i>CTSL</i>  | NM_001912.4 | Normal    | 3366.493 | Stage I   | 26001.42 | 0.033209 | 0.129234 |
| <i>CTSL</i>  | NM_001912.4 | Normal    | 3366.493 | Stage II  | 36041.48 | 0.001716 | 0.011898 |
| <i>CTSL</i>  | NM_001912.4 | Normal    | 3366.493 | Stage III | 22480.74 | 0.000747 | 0.006719 |
| <i>CTSL</i>  | NM_001912.4 | Normal    | 3366.493 | Stage IV  | 15920.57 | 0.01362  | 0.063844 |
| <i>CTSL</i>  | NM_001912.4 | Normal    | 3366.493 | No stage  | 26612.48 | 0.003714 | 0.020841 |
| <i>CTSL</i>  | NM_001912.4 | No stage  | 26612.48 | Stage I   | 26001.42 | 0.442617 | 0.484939 |
| <i>CTSL</i>  | NM_001912.4 | No stage  | 26612.48 | Stage II  | 36041.48 | 0.332503 | 0.441731 |
| <i>CTSL</i>  | NM_001912.4 | No stage  | 26612.48 | Stage III | 22480.74 | 0.329104 | 0.441731 |
| <i>CTSL</i>  | NM_001912.4 | No stage  | 26612.48 | Stage IV  | 15920.57 | 0.157937 | 0.289552 |
| <i>CTSL</i>  | NM_001912.4 | No stage  | 26612.48 | Normal    | 3366.493 | 0.003714 | 0.020841 |
| <i>EPASI</i> | NM_001430.3 | Stage I   | 283.21   | Stage II  | 3203.148 | 0.096965 | 0.219168 |

|              |             |           |          |           |          |          |          |
|--------------|-------------|-----------|----------|-----------|----------|----------|----------|
| <i>EPASI</i> | NM_001430.3 | Stage I   | 283.21   | Stage III | 3505.034 | 0.0869   | 0.219168 |
| <i>EPASI</i> | NM_001430.3 | Stage I   | 283.21   | Stage IV  | 1865.092 | 0.122276 | 0.257458 |
| <i>EPASI</i> | NM_001430.3 | Stage I   | 283.21   | Normal    | 1235.516 | 0.060794 | 0.178571 |
| <i>EPASI</i> | NM_001430.3 | Stage I   | 283.21   | No stage  | 1649.365 | 0.096965 | 0.219168 |
| <i>EPASI</i> | NM_001430.3 | Stage II  | 3203.148 | Stage I   | 283.21   | 0.096965 | 0.219168 |
| <i>EPASI</i> | NM_001430.3 | Stage II  | 3203.148 | Stage III | 3505.034 | 0.350567 | 0.450864 |
| <i>EPASI</i> | NM_001430.3 | Stage II  | 3203.148 | Stage IV  | 1865.092 | 0.243427 | 0.37725  |
| <i>EPASI</i> | NM_001430.3 | Stage II  | 3203.148 | Normal    | 1235.516 | 0.010746 | 0.051846 |
| <i>EPASI</i> | NM_001430.3 | Stage II  | 3203.148 | No stage  | 1649.365 | 0.442617 | 0.484939 |
| <i>EPASI</i> | NM_001430.3 | Stage III | 3505.034 | Stage I   | 283.21   | 0.0869   | 0.219168 |
| <i>EPASI</i> | NM_001430.3 | Stage III | 3505.034 | Stage II  | 3203.148 | 0.350567 | 0.450864 |
| <i>EPASI</i> | NM_001430.3 | Stage III | 3505.034 | Stage IV  | 1865.092 | 0.266539 | 0.400217 |
| <i>EPASI</i> | NM_001430.3 | Stage III | 3505.034 | Normal    | 1235.516 | 0.002074 | 0.01298  |
| <i>EPASI</i> | NM_001430.3 | Stage III | 3505.034 | No stage  | 1649.365 | 0.488224 | 0.497289 |
| <i>EPASI</i> | NM_001430.3 | Stage IV  | 1865.092 | Stage I   | 283.21   | 0.122276 | 0.257458 |
| <i>EPASI</i> | NM_001430.3 | Stage IV  | 1865.092 | Stage II  | 3203.148 | 0.243427 | 0.37725  |
| <i>EPASI</i> | NM_001430.3 | Stage IV  | 1865.092 | Stage III | 3505.034 | 0.266539 | 0.400217 |
| <i>EPASI</i> | NM_001430.3 | Stage IV  | 1865.092 | Normal    | 1235.516 | 0.015165 | 0.068486 |
| <i>EPASI</i> | NM_001430.3 | Stage IV  | 1865.092 | No stage  | 1649.365 | 0.294321 | 0.426362 |
| <i>EPASI</i> | NM_001430.3 | Normal    | 1235.516 | Stage I   | 283.21   | 0.060794 | 0.178571 |
| <i>EPASI</i> | NM_001430.3 | Normal    | 1235.516 | Stage II  | 3203.148 | 0.010746 | 0.051846 |
| <i>EPASI</i> | NM_001430.3 | Normal    | 1235.516 | Stage III | 3505.034 | 0.002074 | 0.01298  |

|                |             |           |          |           |          |          |          |
|----------------|-------------|-----------|----------|-----------|----------|----------|----------|
| <i>EPASI</i>   | NM_001430.3 | Normal    | 1235.516 | Stage IV  | 1865.092 | 0.015165 | 0.068486 |
| <i>EPASI</i>   | NM_001430.3 | Normal    | 1235.516 | No stage  | 1649.365 | 0.015391 | 0.06901  |
| <i>EPASI</i>   | NM_001430.3 | No stage  | 1649.365 | Stage I   | 283.21   | 0.096965 | 0.219168 |
| <i>EPASI</i>   | NM_001430.3 | No stage  | 1649.365 | Stage II  | 3203.148 | 0.442617 | 0.484939 |
| <i>EPASI</i>   | NM_001430.3 | No stage  | 1649.365 | Stage III | 3505.034 | 0.488224 | 0.497289 |
| <i>EPASI</i>   | NM_001430.3 | No stage  | 1649.365 | Stage IV  | 1865.092 | 0.294321 | 0.426362 |
| <i>EPASI</i>   | NM_001430.3 | No stage  | 1649.365 | Normal    | 1235.516 | 0.015391 | 0.06901  |
| <i>FAM129C</i> | NM_173544.4 | Stage I   | 58697.87 | Stage II  | 99605.14 | 0.156161 | 0.289552 |
| <i>FAM129C</i> | NM_173544.4 | Stage I   | 58697.87 | Stage III | 59054.28 | 0.418302 | 0.484939 |
| <i>FAM129C</i> | NM_173544.4 | Stage I   | 58697.87 | Stage IV  | 47203.52 | 0.321486 | 0.441731 |
| <i>FAM129C</i> | NM_173544.4 | Stage I   | 58697.87 | Normal    | 16909.75 | 0.05612  | 0.169761 |
| <i>FAM129C</i> | NM_173544.4 | Stage I   | 58697.87 | No stage  | 82975.95 | 0.442617 | 0.484939 |
| <i>FAM129C</i> | NM_173544.4 | Stage II  | 99605.14 | Stage I   | 58697.87 | 0.156161 | 0.289552 |
| <i>FAM129C</i> | NM_173544.4 | Stage II  | 99605.14 | Stage III | 59054.28 | 0.083064 | 0.211506 |
| <i>FAM129C</i> | NM_173544.4 | Stage II  | 99605.14 | Stage IV  | 47203.52 | 0.07134  | 0.191712 |
| <i>FAM129C</i> | NM_173544.4 | Stage II  | 99605.14 | Normal    | 16909.75 | 0.00213  | 0.013213 |
| <i>FAM129C</i> | NM_173544.4 | Stage II  | 99605.14 | No stage  | 82975.95 | 0.332503 | 0.441731 |
| <i>FAM129C</i> | NM_173544.4 | Stage III | 59054.28 | Stage I   | 58697.87 | 0.418302 | 0.484939 |
| <i>FAM129C</i> | NM_173544.4 | Stage III | 59054.28 | Stage II  | 99605.14 | 0.083064 | 0.211506 |
| <i>FAM129C</i> | NM_173544.4 | Stage III | 59054.28 | Stage IV  | 47203.52 | 0.210777 | 0.35488  |
| <i>FAM129C</i> | NM_173544.4 | Stage III | 59054.28 | Normal    | 16909.75 | 2.12E-05 | 0.001095 |
| <i>FAM129C</i> | NM_173544.4 | Stage III | 59054.28 | No stage  | 82975.95 | 0.464784 | 0.490662 |

|                |             |          |          |           |          |          |          |
|----------------|-------------|----------|----------|-----------|----------|----------|----------|
| <i>FAM129C</i> | NM_173544.4 | Stage IV | 47203.52 | Stage I   | 58697.87 | 0.321486 | 0.441731 |
| <i>FAM129C</i> | NM_173544.4 | Stage IV | 47203.52 | Stage II  | 99605.14 | 0.07134  | 0.191712 |
| <i>FAM129C</i> | NM_173544.4 | Stage IV | 47203.52 | Stage III | 59054.28 | 0.210777 | 0.35488  |
| <i>FAM129C</i> | NM_173544.4 | Stage IV | 47203.52 | Normal    | 16909.75 | 0.022947 | 0.096098 |
| <i>FAM129C</i> | NM_173544.4 | Stage IV | 47203.52 | No stage  | 82975.95 | 0.294577 | 0.426362 |
| <i>FAM129C</i> | NM_173544.4 | Normal   | 16909.75 | Stage I   | 58697.87 | 0.05612  | 0.169761 |
| <i>FAM129C</i> | NM_173544.4 | Normal   | 16909.75 | Stage II  | 99605.14 | 0.00213  | 0.013213 |
| <i>FAM129C</i> | NM_173544.4 | Normal   | 16909.75 | Stage III | 59054.28 | 2.12E-05 | 0.001095 |
| <i>FAM129C</i> | NM_173544.4 | Normal   | 16909.75 | Stage IV  | 47203.52 | 0.022947 | 0.096098 |
| <i>FAM129C</i> | NM_173544.4 | Normal   | 16909.75 | No stage  | 82975.95 | 0.008853 | 0.043475 |
| <i>FAM129C</i> | NM_173544.4 | No stage | 82975.95 | Stage I   | 58697.87 | 0.442617 | 0.484939 |
| <i>FAM129C</i> | NM_173544.4 | No stage | 82975.95 | Stage II  | 99605.14 | 0.332503 | 0.441731 |
| <i>FAM129C</i> | NM_173544.4 | No stage | 82975.95 | Stage III | 59054.28 | 0.464784 | 0.490662 |
| <i>FAM129C</i> | NM_173544.4 | No stage | 82975.95 | Stage IV  | 47203.52 | 0.294577 | 0.426362 |
| <i>FAM129C</i> | NM_173544.4 | No stage | 82975.95 | Normal    | 16909.75 | 0.008853 | 0.043475 |
| <i>FAP</i>     | NM_004460.2 | Stage I  | 321.02   | Stage II  | 102.3725 | 0.235243 | 0.371082 |
| <i>FAP</i>     | NM_004460.2 | Stage I  | 321.02   | Stage III | 869.8074 | 0.405272 | 0.484939 |
| <i>FAP</i>     | NM_004460.2 | Stage I  | 321.02   | Stage IV  | 46.50889 | 0.2581   | 0.394319 |
| <i>FAP</i>     | NM_004460.2 | Stage I  | 321.02   | Normal    | 20       | 0.000926 | 0.00688  |
| <i>FAP</i>     | NM_004460.2 | Stage I  | 321.02   | No stage  | 792.0325 | 0.096965 | 0.219168 |
| <i>FAP</i>     | NM_004460.2 | Stage II | 102.3725 | Stage I   | 321.02   | 0.235243 | 0.371082 |
| <i>FAP</i>     | NM_004460.2 | Stage II | 102.3725 | Stage III | 869.8074 | 0.488103 | 0.497289 |

|            |             |           |          |           |          |          |          |
|------------|-------------|-----------|----------|-----------|----------|----------|----------|
| <i>FAP</i> | NM_004460.2 | Stage II  | 102.3725 | Stage IV  | 46.50889 | 0.065791 | 0.187162 |
| <i>FAP</i> | NM_004460.2 | Stage II  | 102.3725 | Normal    | 20       | 9.06E-05 | 0.001384 |
| <i>FAP</i> | NM_004460.2 | Stage II  | 102.3725 | No stage  | 792.0325 | 0.015191 | 0.068486 |
| <i>FAP</i> | NM_004460.2 | Stage III | 869.8074 | Stage I   | 321.02   | 0.405272 | 0.484939 |
| <i>FAP</i> | NM_004460.2 | Stage III | 869.8074 | Stage II  | 102.3725 | 0.488103 | 0.497289 |
| <i>FAP</i> | NM_004460.2 | Stage III | 869.8074 | Stage IV  | 46.50889 | 0.054775 | 0.169761 |
| <i>FAP</i> | NM_004460.2 | Stage III | 869.8074 | Normal    | 20       | 0.000185 | 0.00228  |
| <i>FAP</i> | NM_004460.2 | Stage III | 869.8074 | No stage  | 792.0325 | 0.071944 | 0.192707 |
| <i>FAP</i> | NM_004460.2 | Stage IV  | 46.50889 | Stage I   | 321.02   | 0.2581   | 0.394319 |
| <i>FAP</i> | NM_004460.2 | Stage IV  | 46.50889 | Stage II  | 102.3725 | 0.065791 | 0.187162 |
| <i>FAP</i> | NM_004460.2 | Stage IV  | 46.50889 | Stage III | 869.8074 | 0.054775 | 0.169761 |
| <i>FAP</i> | NM_004460.2 | Stage IV  | 46.50889 | Normal    | 20       | 0.007431 | 0.038558 |
| <i>FAP</i> | NM_004460.2 | Stage IV  | 46.50889 | No stage  | 792.0325 | 0.002737 | 0.01613  |
| <i>FAP</i> | NM_004460.2 | Normal    | 20       | Stage I   | 321.02   | 0.000926 | 0.00688  |
| <i>FAP</i> | NM_004460.2 | Normal    | 20       | Stage II  | 102.3725 | 9.06E-05 | 0.001384 |
| <i>FAP</i> | NM_004460.2 | Normal    | 20       | Stage III | 869.8074 | 0.000185 | 0.00228  |
| <i>FAP</i> | NM_004460.2 | Normal    | 20       | Stage IV  | 46.50889 | 0.007431 | 0.038558 |
| <i>FAP</i> | NM_004460.2 | Normal    | 20       | No stage  | 792.0325 | 9.06E-05 | 0.001384 |
| <i>FAP</i> | NM_004460.2 | No stage  | 792.0325 | Stage I   | 321.02   | 0.096965 | 0.219168 |
| <i>FAP</i> | NM_004460.2 | No stage  | 792.0325 | Stage II  | 102.3725 | 0.015191 | 0.068486 |
| <i>FAP</i> | NM_004460.2 | No stage  | 792.0325 | Stage III | 869.8074 | 0.071944 | 0.192707 |
| <i>FAP</i> | NM_004460.2 | No stage  | 792.0325 | Stage IV  | 46.50889 | 0.002737 | 0.01613  |

|            |             |           |          |           |          |          |          |
|------------|-------------|-----------|----------|-----------|----------|----------|----------|
| <i>FAP</i> | NM_004460.2 | No stage  | 792.0325 | Normal    | 20       | 9.06E-05 | 0.001384 |
| <i>GK</i>  | NM_000167.3 | Stage I   | 19534.83 | Stage II  | 29865.46 | 0.235243 | 0.371082 |
| <i>GK</i>  | NM_000167.3 | Stage I   | 19534.83 | Stage III | 20696.59 | 0.488243 | 0.497289 |
| <i>GK</i>  | NM_000167.3 | Stage I   | 19534.83 | Stage IV  | 10550.17 | 0.378649 | 0.47475  |
| <i>GK</i>  | NM_000167.3 | Stage I   | 19534.83 | Normal    | 3633.967 | 0.062177 | 0.179986 |
| <i>GK</i>  | NM_000167.3 | Stage I   | 19534.83 | No stage  | 17962.45 | 0.442617 | 0.484939 |
| <i>GK</i>  | NM_000167.3 | Stage II  | 29865.46 | Stage I   | 19534.83 | 0.235243 | 0.371082 |
| <i>GK</i>  | NM_000167.3 | Stage II  | 29865.46 | Stage III | 20696.59 | 0.165433 | 0.301286 |
| <i>GK</i>  | NM_000167.3 | Stage II  | 29865.46 | Stage IV  | 10550.17 | 0.07134  | 0.191712 |
| <i>GK</i>  | NM_000167.3 | Stage II  | 29865.46 | Normal    | 3633.967 | 0.00828  | 0.041399 |
| <i>GK</i>  | NM_000167.3 | Stage II  | 29865.46 | No stage  | 17962.45 | 0.156161 | 0.289552 |
| <i>GK</i>  | NM_000167.3 | Stage III | 20696.59 | Stage I   | 19534.83 | 0.488243 | 0.497289 |
| <i>GK</i>  | NM_000167.3 | Stage III | 20696.59 | Stage II  | 29865.46 | 0.165433 | 0.301286 |
| <i>GK</i>  | NM_000167.3 | Stage III | 20696.59 | Stage IV  | 10550.17 | 0.180473 | 0.322218 |
| <i>GK</i>  | NM_000167.3 | Stage III | 20696.59 | Normal    | 3633.967 | 0.000671 | 0.006223 |
| <i>GK</i>  | NM_000167.3 | Stage III | 20696.59 | No stage  | 17962.45 | 0.488247 | 0.497289 |
| <i>GK</i>  | NM_000167.3 | Stage IV  | 10550.17 | Stage I   | 19534.83 | 0.378649 | 0.47475  |
| <i>GK</i>  | NM_000167.3 | Stage IV  | 10550.17 | Stage II  | 29865.46 | 0.07134  | 0.191712 |
| <i>GK</i>  | NM_000167.3 | Stage IV  | 10550.17 | Stage III | 20696.59 | 0.180473 | 0.322218 |
| <i>GK</i>  | NM_000167.3 | Stage IV  | 10550.17 | Normal    | 3633.967 | 0.011996 | 0.057537 |
| <i>GK</i>  | NM_000167.3 | Stage IV  | 10550.17 | No stage  | 17962.45 | 0.408481 | 0.484939 |
| <i>GK</i>  | NM_000167.3 | Normal    | 3633.967 | Stage I   | 19534.83 | 0.062177 | 0.179986 |

|               |             |           |          |           |          |          |          |
|---------------|-------------|-----------|----------|-----------|----------|----------|----------|
| <i>GK</i>     | NM_000167.3 | Normal    | 3633.967 | Stage II  | 29865.46 | 0.00828  | 0.041399 |
| <i>GK</i>     | NM_000167.3 | Normal    | 3633.967 | Stage III | 20696.59 | 0.000671 | 0.006223 |
| <i>GK</i>     | NM_000167.3 | Normal    | 3633.967 | Stage IV  | 10550.17 | 0.011996 | 0.057537 |
| <i>GK</i>     | NM_000167.3 | Normal    | 3633.967 | No stage  | 17962.45 | 0.068162 | 0.190624 |
| <i>GK</i>     | NM_000167.3 | No stage  | 17962.45 | Stage I   | 19534.83 | 0.442617 | 0.484939 |
| <i>GK</i>     | NM_000167.3 | No stage  | 17962.45 | Stage II  | 29865.46 | 0.156161 | 0.289552 |
| <i>GK</i>     | NM_000167.3 | No stage  | 17962.45 | Stage III | 20696.59 | 0.488247 | 0.497289 |
| <i>GK</i>     | NM_000167.3 | No stage  | 17962.45 | Stage IV  | 10550.17 | 0.408481 | 0.484939 |
| <i>GK</i>     | NM_000167.3 | No stage  | 17962.45 | Normal    | 3633.967 | 0.068162 | 0.190624 |
| <i>GUCY2C</i> | NM_004963.1 | Stage I   | 61.775   | Stage II  | 97.025   | 0.096965 | 0.219168 |
| <i>GUCY2C</i> | NM_004963.1 | Stage I   | 61.775   | Stage III | 494.8544 | 0.394183 | 0.484939 |
| <i>GUCY2C</i> | NM_004963.1 | Stage I   | 61.775   | Stage IV  | 68.26778 | 0.468372 | 0.490662 |
| <i>GUCY2C</i> | NM_004963.1 | Stage I   | 61.775   | Normal    | 20       | 0.000926 | 0.00688  |
| <i>GUCY2C</i> | NM_004963.1 | Stage I   | 61.775   | No stage  | 120.17   | 0.015191 | 0.068486 |
| <i>GUCY2C</i> | NM_004963.1 | Stage II  | 97.025   | Stage I   | 61.775   | 0.096965 | 0.219168 |
| <i>GUCY2C</i> | NM_004963.1 | Stage II  | 97.025   | Stage III | 494.8544 | 0.14916  | 0.289552 |
| <i>GUCY2C</i> | NM_004963.1 | Stage II  | 97.025   | Stage IV  | 68.26778 | 0.194737 | 0.338255 |
| <i>GUCY2C</i> | NM_004963.1 | Stage II  | 97.025   | Normal    | 20       | 9.06E-05 | 0.001384 |
| <i>GUCY2C</i> | NM_004963.1 | Stage II  | 97.025   | No stage  | 120.17   | 0.156161 | 0.289552 |
| <i>GUCY2C</i> | NM_004963.1 | Stage III | 494.8544 | Stage I   | 61.775   | 0.394183 | 0.484939 |
| <i>GUCY2C</i> | NM_004963.1 | Stage III | 494.8544 | Stage II  | 97.025   | 0.14916  | 0.289552 |
| <i>GUCY2C</i> | NM_004963.1 | Stage III | 494.8544 | Stage IV  | 68.26778 | 0.341097 | 0.449529 |



|               |             |           |          |           |          |          |          |
|---------------|-------------|-----------|----------|-----------|----------|----------|----------|
| <i>GUCY2C</i> | NM_004963.1 | Stage III | 494.8544 | Normal    | 20       | 0.000103 | 0.001459 |
| <i>GUCY2C</i> | NM_004963.1 | Stage III | 494.8544 | No stage  | 120.17   | 0.051093 | 0.168605 |
| <i>GUCY2C</i> | NM_004963.1 | Stage IV  | 68.26778 | Stage I   | 61.775   | 0.468372 | 0.490662 |
| <i>GUCY2C</i> | NM_004963.1 | Stage IV  | 68.26778 | Stage II  | 97.025   | 0.194737 | 0.338255 |
| <i>GUCY2C</i> | NM_004963.1 | Stage IV  | 68.26778 | Stage III | 494.8544 | 0.341097 | 0.449529 |
| <i>GUCY2C</i> | NM_004963.1 | Stage IV  | 68.26778 | Normal    | 20       | 0.002512 | 0.01502  |
| <i>GUCY2C</i> | NM_004963.1 | Stage IV  | 68.26778 | No stage  | 120.17   | 0.068581 | 0.191147 |
| <i>GUCY2C</i> | NM_004963.1 | Normal    | 20       | Stage I   | 61.775   | 0.000926 | 0.00688  |
| <i>GUCY2C</i> | NM_004963.1 | Normal    | 20       | Stage II  | 97.025   | 9.06E-05 | 0.001384 |
| <i>GUCY2C</i> | NM_004963.1 | Normal    | 20       | Stage III | 494.8544 | 0.000103 | 0.001459 |
| <i>GUCY2C</i> | NM_004963.1 | Normal    | 20       | Stage IV  | 68.26778 | 0.002512 | 0.01502  |
| <i>GUCY2C</i> | NM_004963.1 | Normal    | 20       | No stage  | 120.17   | 9.06E-05 | 0.001384 |
| <i>GUCY2C</i> | NM_004963.1 | No stage  | 120.17   | Stage I   | 61.775   | 0.015191 | 0.068486 |
| <i>GUCY2C</i> | NM_004963.1 | No stage  | 120.17   | Stage II  | 97.025   | 0.156161 | 0.289552 |
| <i>GUCY2C</i> | NM_004963.1 | No stage  | 120.17   | Stage III | 494.8544 | 0.051093 | 0.168605 |
| <i>GUCY2C</i> | NM_004963.1 | No stage  | 120.17   | Stage IV  | 68.26778 | 0.068581 | 0.191147 |
| <i>GUCY2C</i> | NM_004963.1 | No stage  | 120.17   | Normal    | 20       | 9.06E-05 | 0.001384 |
| <i>INHBA</i>  | NM_002192.2 | Stage I   | 50134.49 | Stage II  | 86119.04 | 0.156161 | 0.289552 |
| <i>INHBA</i>  | NM_002192.2 | Stage I   | 50134.49 | Stage III | 54501    | 0.372885 | 0.47115  |
| <i>INHBA</i>  | NM_002192.2 | Stage I   | 50134.49 | Stage IV  | 47530.9  | 0.438602 | 0.484939 |
| <i>INHBA</i>  | NM_002192.2 | Stage I   | 50134.49 | Normal    | 18310.55 | 0.048283 | 0.162585 |
| <i>INHBA</i>  | NM_002192.2 | Stage I   | 50134.49 | No stage  | 53943.73 | 0.442617 | 0.484939 |

|              |             |           |          |           |          |          |          |
|--------------|-------------|-----------|----------|-----------|----------|----------|----------|
| <i>INHBA</i> | NM_002192.2 | Stage II  | 86119.04 | Stage I   | 50134.49 | 0.156161 | 0.289552 |
| <i>INHBA</i> | NM_002192.2 | Stage II  | 86119.04 | Stage III | 54501    | 0.066451 | 0.187162 |
| <i>INHBA</i> | NM_002192.2 | Stage II  | 86119.04 | Stage IV  | 47530.9  | 0.037991 | 0.140222 |
| <i>INHBA</i> | NM_002192.2 | Stage II  | 86119.04 | Normal    | 18310.55 | 0.002991 | 0.017253 |
| <i>INHBA</i> | NM_002192.2 | Stage II  | 86119.04 | No stage  | 53943.73 | 0.096965 | 0.219168 |
| <i>INHBA</i> | NM_002192.2 | Stage III | 54501    | Stage I   | 50134.49 | 0.372885 | 0.47115  |
| <i>INHBA</i> | NM_002192.2 | Stage III | 54501    | Stage II  | 86119.04 | 0.066451 | 0.187162 |
| <i>INHBA</i> | NM_002192.2 | Stage III | 54501    | Stage IV  | 47530.9  | 0.456352 | 0.490662 |
| <i>INHBA</i> | NM_002192.2 | Stage III | 54501    | Normal    | 18310.55 | 0.000422 | 0.004353 |
| <i>INHBA</i> | NM_002192.2 | Stage III | 54501    | No stage  | 53943.73 | 0.418294 | 0.484939 |
| <i>INHBA</i> | NM_002192.2 | Stage IV  | 47530.9  | Stage I   | 50134.49 | 0.438602 | 0.484939 |
| <i>INHBA</i> | NM_002192.2 | Stage IV  | 47530.9  | Stage II  | 86119.04 | 0.037991 | 0.140222 |
| <i>INHBA</i> | NM_002192.2 | Stage IV  | 47530.9  | Stage III | 54501    | 0.456352 | 0.490662 |
| <i>INHBA</i> | NM_002192.2 | Stage IV  | 47530.9  | Normal    | 18310.55 | 0.020741 | 0.08912  |
| <i>INHBA</i> | NM_002192.2 | Stage IV  | 47530.9  | No stage  | 53943.73 | 0.469251 | 0.490662 |
| <i>INHBA</i> | NM_002192.2 | Normal    | 18310.55 | Stage I   | 50134.49 | 0.048283 | 0.162585 |
| <i>INHBA</i> | NM_002192.2 | Normal    | 18310.55 | Stage II  | 86119.04 | 0.002991 | 0.017253 |
| <i>INHBA</i> | NM_002192.2 | Normal    | 18310.55 | Stage III | 54501    | 0.000422 | 0.004353 |
| <i>INHBA</i> | NM_002192.2 | Normal    | 18310.55 | Stage IV  | 47530.9  | 0.020741 | 0.08912  |
| <i>INHBA</i> | NM_002192.2 | Normal    | 18310.55 | No stage  | 53943.73 | 0.004312 | 0.023873 |
| <i>INHBA</i> | NM_002192.2 | No stage  | 53943.73 | Stage I   | 50134.49 | 0.442617 | 0.484939 |
| <i>INHBA</i> | NM_002192.2 | No stage  | 53943.73 | Stage II  | 86119.04 | 0.096965 | 0.219168 |

|                      |             |           |          |           |          |          |          |
|----------------------|-------------|-----------|----------|-----------|----------|----------|----------|
| <i>INHBA</i>         | NM_002192.2 | No stage  | 53943.73 | Stage III | 54501    | 0.418294 | 0.484939 |
| <i>INHBA</i>         | NM_002192.2 | No stage  | 53943.73 | Stage IV  | 47530.9  | 0.469251 | 0.490662 |
| <i>INHBA</i>         | NM_002192.2 | No stage  | 53943.73 | Normal    | 18310.55 | 0.004312 | 0.023873 |
| <i>KRT19 exon1-2</i> | NM_002276.4 | Stage I   | 12402.46 | Stage II  | 32193.63 | 0.156161 | 0.289552 |
| <i>KRT19 exon1-2</i> | NM_002276.4 | Stage I   | 12402.46 | Stage III | 26178.84 | 0.125268 | 0.258365 |
| <i>KRT19 exon1-2</i> | NM_002276.4 | Stage I   | 12402.46 | Stage IV  | 29384.17 | 0.157937 | 0.289552 |
| <i>KRT19 exon1-2</i> | NM_002276.4 | Stage I   | 12402.46 | Normal    | 4029.44  | 0.047246 | 0.160405 |
| <i>KRT19 exon1-2</i> | NM_002276.4 | Stage I   | 12402.46 | No stage  | 17119.72 | 0.332503 | 0.441731 |
| <i>KRT19 exon1-2</i> | NM_002276.4 | Stage II  | 32193.63 | Stage I   | 12402.46 | 0.156161 | 0.289552 |
| <i>KRT19 exon1-2</i> | NM_002276.4 | Stage II  | 32193.63 | Stage III | 26178.84 | 0.151224 | 0.289552 |
| <i>KRT19 exon1-2</i> | NM_002276.4 | Stage II  | 32193.63 | Stage IV  | 29384.17 | 0.243727 | 0.37725  |
| <i>KRT19 exon1-2</i> | NM_002276.4 | Stage II  | 32193.63 | Normal    | 4029.44  | 0.003077 | 0.017509 |
| <i>KRT19 exon1-2</i> | NM_002276.4 | Stage II  | 32193.63 | No stage  | 17119.72 | 0.096965 | 0.219168 |
| <i>KRT19 exon1-2</i> | NM_002276.4 | Stage III | 26178.84 | Stage I   | 12402.46 | 0.125268 | 0.258365 |
| <i>KRT19 exon1-2</i> | NM_002276.4 | Stage III | 26178.84 | Stage II  | 32193.63 | 0.151224 | 0.289552 |
| <i>KRT19 exon1-2</i> | NM_002276.4 | Stage III | 26178.84 | Stage IV  | 29384.17 | 0.255399 | 0.391643 |
| <i>KRT19 exon1-2</i> | NM_002276.4 | Stage III | 26178.84 | Normal    | 4029.44  | 3.67E-05 | 0.001384 |
| <i>KRT19 exon1-2</i> | NM_002276.4 | Stage III | 26178.84 | No stage  | 17119.72 | 0.248999 | 0.382852 |
| <i>KRT19 exon1-2</i> | NM_002276.4 | Stage IV  | 29384.17 | Stage I   | 12402.46 | 0.157937 | 0.289552 |
| <i>KRT19 exon1-2</i> | NM_002276.4 | Stage IV  | 29384.17 | Stage II  | 32193.63 | 0.243727 | 0.37725  |
| <i>KRT19 exon1-2</i> | NM_002276.4 | Stage IV  | 29384.17 | Stage III | 26178.84 | 0.255399 | 0.391643 |
| <i>KRT19 exon1-2</i> | NM_002276.4 | Stage IV  | 29384.17 | Normal    | 4029.44  | 0.000495 | 0.005016 |

|                      |             |           |          |           |          |          |          |
|----------------------|-------------|-----------|----------|-----------|----------|----------|----------|
| <i>KRT19 exon1-2</i> | NM_002276.4 | Stage IV  | 29384.17 | No stage  | 17119.72 | 0.469251 | 0.490662 |
| <i>KRT19 exon1-2</i> | NM_002276.4 | Normal    | 4029.44  | Stage I   | 12402.46 | 0.047246 | 0.160405 |
| <i>KRT19 exon1-2</i> | NM_002276.4 | Normal    | 4029.44  | Stage II  | 32193.63 | 0.003077 | 0.017509 |
| <i>KRT19 exon1-2</i> | NM_002276.4 | Normal    | 4029.44  | Stage III | 26178.84 | 3.67E-05 | 0.001384 |
| <i>KRT19 exon1-2</i> | NM_002276.4 | Normal    | 4029.44  | Stage IV  | 29384.17 | 0.000495 | 0.005016 |
| <i>KRT19 exon1-2</i> | NM_002276.4 | Normal    | 4029.44  | No stage  | 17119.72 | 0.006715 | 0.035972 |
| <i>KRT19 exon1-2</i> | NM_002276.4 | No stage  | 17119.72 | Stage I   | 12402.46 | 0.332503 | 0.441731 |
| <i>KRT19 exon1-2</i> | NM_002276.4 | No stage  | 17119.72 | Stage II  | 32193.63 | 0.096965 | 0.219168 |
| <i>KRT19 exon1-2</i> | NM_002276.4 | No stage  | 17119.72 | Stage III | 26178.84 | 0.248999 | 0.382852 |
| <i>KRT19 exon1-2</i> | NM_002276.4 | No stage  | 17119.72 | Stage IV  | 29384.17 | 0.469251 | 0.490662 |
| <i>KRT19 exon1-2</i> | NM_002276.4 | No stage  | 17119.72 | Normal    | 4029.44  | 0.006715 | 0.035972 |
| <i>KRT20 exon1-2</i> | NM_019010.2 | Stage I   | 46344.5  | Stage II  | 116612.9 | 0.056176 | 0.169761 |
| <i>KRT20 exon1-2</i> | NM_019010.2 | Stage I   | 46344.5  | Stage III | 78925.36 | 0.28781  | 0.422497 |
| <i>KRT20 exon1-2</i> | NM_019010.2 | Stage I   | 46344.5  | Stage IV  | 56187.71 | 0.438602 | 0.484939 |
| <i>KRT20 exon1-2</i> | NM_019010.2 | Stage I   | 46344.5  | Normal    | 10225.4  | 0.048283 | 0.162585 |
| <i>KRT20 exon1-2</i> | NM_019010.2 | Stage I   | 46344.5  | No stage  | 80124.04 | 0.235243 | 0.371082 |
| <i>KRT20 exon1-2</i> | NM_019010.2 | Stage II  | 116612.9 | Stage I   | 46344.5  | 0.056176 | 0.169761 |
| <i>KRT20 exon1-2</i> | NM_019010.2 | Stage II  | 116612.9 | Stage III | 78925.36 | 0.046539 | 0.159314 |
| <i>KRT20 exon1-2</i> | NM_019010.2 | Stage II  | 116612.9 | Stage IV  | 56187.71 | 0.052596 | 0.1695   |
| <i>KRT20 exon1-2</i> | NM_019010.2 | Stage II  | 116612.9 | Normal    | 10225.4  | 0.002046 | 0.01298  |
| <i>KRT20 exon1-2</i> | NM_019010.2 | Stage II  | 116612.9 | No stage  | 80124.04 | 0.156161 | 0.289552 |
| <i>KRT20 exon1-2</i> | NM_019010.2 | Stage III | 78925.36 | Stage I   | 46344.5  | 0.28781  | 0.422497 |

|                      |             |           |          |           |          |          |          |
|----------------------|-------------|-----------|----------|-----------|----------|----------|----------|
| <i>KRT20 exon1-2</i> | NM_019010.2 | Stage III | 78925.36 | Stage II  | 116612.9 | 0.046539 | 0.159314 |
| <i>KRT20 exon1-2</i> | NM_019010.2 | Stage III | 78925.36 | Stage IV  | 56187.71 | 0.16197  | 0.295631 |
| <i>KRT20 exon1-2</i> | NM_019010.2 | Stage III | 78925.36 | Normal    | 10225.4  | 0.000137 | 0.00177  |
| <i>KRT20 exon1-2</i> | NM_019010.2 | Stage III | 78925.36 | No stage  | 80124.04 | 0.350854 | 0.450864 |
| <i>KRT20 exon1-2</i> | NM_019010.2 | Stage IV  | 56187.71 | Stage I   | 46344.5  | 0.438602 | 0.484939 |
| <i>KRT20 exon1-2</i> | NM_019010.2 | Stage IV  | 56187.71 | Stage II  | 116612.9 | 0.052596 | 0.1695   |
| <i>KRT20 exon1-2</i> | NM_019010.2 | Stage IV  | 56187.71 | Stage III | 78925.36 | 0.16197  | 0.295631 |
| <i>KRT20 exon1-2</i> | NM_019010.2 | Stage IV  | 56187.71 | Normal    | 10225.4  | 0.024583 | 0.101913 |
| <i>KRT20 exon1-2</i> | NM_019010.2 | Stage IV  | 56187.71 | No stage  | 80124.04 | 0.12358  | 0.257458 |
| <i>KRT20 exon1-2</i> | NM_019010.2 | Normal    | 10225.4  | Stage I   | 46344.5  | 0.048283 | 0.162585 |
| <i>KRT20 exon1-2</i> | NM_019010.2 | Normal    | 10225.4  | Stage II  | 116612.9 | 0.002046 | 0.01298  |
| <i>KRT20 exon1-2</i> | NM_019010.2 | Normal    | 10225.4  | Stage III | 78925.36 | 0.000137 | 0.00177  |
| <i>KRT20 exon1-2</i> | NM_019010.2 | Normal    | 10225.4  | Stage IV  | 56187.71 | 0.024583 | 0.101913 |
| <i>KRT20 exon1-2</i> | NM_019010.2 | Normal    | 10225.4  | No stage  | 80124.04 | 0.002046 | 0.01298  |
| <i>KRT20 exon1-2</i> | NM_019010.2 | No stage  | 80124.04 | Stage I   | 46344.5  | 0.235243 | 0.371082 |
| <i>KRT20 exon1-2</i> | NM_019010.2 | No stage  | 80124.04 | Stage II  | 116612.9 | 0.156161 | 0.289552 |
| <i>KRT20 exon1-2</i> | NM_019010.2 | No stage  | 80124.04 | Stage III | 78925.36 | 0.350854 | 0.450864 |
| <i>KRT20 exon1-2</i> | NM_019010.2 | No stage  | 80124.04 | Stage IV  | 56187.71 | 0.12358  | 0.257458 |
| <i>KRT20 exon1-2</i> | NM_019010.2 | No stage  | 80124.04 | Normal    | 10225.4  | 0.002046 | 0.01298  |
| <i>MKI67</i>         | NM_002417.2 | Stage I   | 56987.24 | Stage II  | 74004.38 | 0.332503 | 0.441731 |
| <i>MKI67</i>         | NM_002417.2 | Stage I   | 56987.24 | Stage III | 77026.36 | 0.308232 | 0.438434 |
| <i>MKI67</i>         | NM_002417.2 | Stage I   | 56987.24 | Stage IV  | 52881.03 | 0.438602 | 0.484939 |

|              |             |           |          |           |          |          |          |
|--------------|-------------|-----------|----------|-----------|----------|----------|----------|
| <i>MKI67</i> | NM_002417.2 | Stage I   | 56987.24 | Normal    | 22054.26 | 0.078453 | 0.206786 |
| <i>MKI67</i> | NM_002417.2 | Stage I   | 56987.24 | No stage  | 47471.99 | 0.442617 | 0.484939 |
| <i>MKI67</i> | NM_002417.2 | Stage II  | 74004.38 | Stage I   | 56987.24 | 0.332503 | 0.441731 |
| <i>MKI67</i> | NM_002417.2 | Stage II  | 74004.38 | Stage III | 77026.36 | 0.125268 | 0.258365 |
| <i>MKI67</i> | NM_002417.2 | Stage II  | 74004.38 | Stage IV  | 52881.03 | 0.198033 | 0.338255 |
| <i>MKI67</i> | NM_002417.2 | Stage II  | 74004.38 | Normal    | 22054.26 | 0.002991 | 0.017253 |
| <i>MKI67</i> | NM_002417.2 | Stage II  | 74004.38 | No stage  | 47471.99 | 0.096965 | 0.219168 |
| <i>MKI67</i> | NM_002417.2 | Stage III | 77026.36 | Stage I   | 56987.24 | 0.308232 | 0.438434 |
| <i>MKI67</i> | NM_002417.2 | Stage III | 77026.36 | Stage II  | 74004.38 | 0.125268 | 0.258365 |
| <i>MKI67</i> | NM_002417.2 | Stage III | 77026.36 | Stage IV  | 52881.03 | 0.221483 | 0.363796 |
| <i>MKI67</i> | NM_002417.2 | Stage III | 77026.36 | Normal    | 22054.26 | 0.001822 | 0.012458 |
| <i>MKI67</i> | NM_002417.2 | Stage III | 77026.36 | No stage  | 47471.99 | 0.418302 | 0.484939 |
| <i>MKI67</i> | NM_002417.2 | Stage IV  | 52881.03 | Stage I   | 56987.24 | 0.438602 | 0.484939 |
| <i>MKI67</i> | NM_002417.2 | Stage IV  | 52881.03 | Stage II  | 74004.38 | 0.198033 | 0.338255 |
| <i>MKI67</i> | NM_002417.2 | Stage IV  | 52881.03 | Stage III | 77026.36 | 0.221483 | 0.363796 |
| <i>MKI67</i> | NM_002417.2 | Stage IV  | 52881.03 | Normal    | 22054.26 | 0.105317 | 0.232939 |
| <i>MKI67</i> | NM_002417.2 | Stage IV  | 52881.03 | No stage  | 47471.99 | 0.408481 | 0.484939 |
| <i>MKI67</i> | NM_002417.2 | Normal    | 22054.26 | Stage I   | 56987.24 | 0.078453 | 0.206786 |
| <i>MKI67</i> | NM_002417.2 | Normal    | 22054.26 | Stage II  | 74004.38 | 0.002991 | 0.017253 |
| <i>MKI67</i> | NM_002417.2 | Normal    | 22054.26 | Stage III | 77026.36 | 0.001822 | 0.012458 |
| <i>MKI67</i> | NM_002417.2 | Normal    | 22054.26 | Stage IV  | 52881.03 | 0.105317 | 0.232939 |
| <i>MKI67</i> | NM_002417.2 | Normal    | 22054.26 | No stage  | 47471.99 | 0.01626  | 0.071734 |

|                     |             |           |          |           |          |          |          |
|---------------------|-------------|-----------|----------|-----------|----------|----------|----------|
| <i>MKI67</i>        | NM_002417.2 | No stage  | 47471.99 | Stage I   | 56987.24 | 0.442617 | 0.484939 |
| <i>MKI67</i>        | NM_002417.2 | No stage  | 47471.99 | Stage II  | 74004.38 | 0.096965 | 0.219168 |
| <i>MKI67</i>        | NM_002417.2 | No stage  | 47471.99 | Stage III | 77026.36 | 0.418302 | 0.484939 |
| <i>MKI67</i>        | NM_002417.2 | No stage  | 47471.99 | Stage IV  | 52881.03 | 0.408481 | 0.484939 |
| <i>MKI67</i>        | NM_002417.2 | No stage  | 47471.99 | Normal    | 22054.26 | 0.01626  | 0.071734 |
| <i>MMP7 exon1-2</i> | NM_002423.4 | Stage I   | 3649.235 | Stage II  | 277.8825 | 0.442617 | 0.484939 |
| <i>MMP7 exon1-2</i> | NM_002423.4 | Stage I   | 3649.235 | Stage III | 382.3    | 0.476422 | 0.492626 |
| <i>MMP7 exon1-2</i> | NM_002423.4 | Stage I   | 3649.235 | Stage IV  | 120.2722 | 0.377165 | 0.47475  |
| <i>MMP7 exon1-2</i> | NM_002423.4 | Stage I   | 3649.235 | Normal    | 20       | 0.000926 | 0.00688  |
| <i>MMP7 exon1-2</i> | NM_002423.4 | Stage I   | 3649.235 | No stage  | 147.9875 | 0.442617 | 0.484939 |
| <i>MMP7 exon1-2</i> | NM_002423.4 | Stage II  | 277.8825 | Stage I   | 3649.235 | 0.442617 | 0.484939 |
| <i>MMP7 exon1-2</i> | NM_002423.4 | Stage II  | 277.8825 | Stage III | 382.3    | 0.441325 | 0.484939 |
| <i>MMP7 exon1-2</i> | NM_002423.4 | Stage II  | 277.8825 | Stage IV  | 120.2722 | 0.1566   | 0.289552 |
| <i>MMP7 exon1-2</i> | NM_002423.4 | Stage II  | 277.8825 | Normal    | 20       | 9.06E-05 | 0.001384 |
| <i>MMP7 exon1-2</i> | NM_002423.4 | Stage II  | 277.8825 | No stage  | 147.9875 | 0.442617 | 0.484939 |
| <i>MMP7 exon1-2</i> | NM_002423.4 | Stage III | 382.3    | Stage I   | 3649.235 | 0.476422 | 0.492626 |
| <i>MMP7 exon1-2</i> | NM_002423.4 | Stage III | 382.3    | Stage II  | 277.8825 | 0.441325 | 0.484939 |
| <i>MMP7 exon1-2</i> | NM_002423.4 | Stage III | 382.3    | Stage IV  | 120.2722 | 0.131286 | 0.26943  |
| <i>MMP7 exon1-2</i> | NM_002423.4 | Stage III | 382.3    | Normal    | 20       | 1.47E-05 | 0.000916 |
| <i>MMP7 exon1-2</i> | NM_002423.4 | Stage III | 382.3    | No stage  | 147.9875 | 0.307876 | 0.438434 |
| <i>MMP7 exon1-2</i> | NM_002423.4 | Stage IV  | 120.2722 | Stage I   | 3649.235 | 0.377165 | 0.47475  |
| <i>MMP7 exon1-2</i> | NM_002423.4 | Stage IV  | 120.2722 | Stage II  | 277.8825 | 0.1566   | 0.289552 |

|                     |             |          |          |           |          |          |          |
|---------------------|-------------|----------|----------|-----------|----------|----------|----------|
| <i>MMP7 exon1-2</i> | NM_002423.4 | Stage IV | 120.2722 | Stage III | 382.3    | 0.131286 | 0.26943  |
| <i>MMP7 exon1-2</i> | NM_002423.4 | Stage IV | 120.2722 | Normal    | 20       | 0.000782 | 0.006719 |
| <i>MMP7 exon1-2</i> | NM_002423.4 | Stage IV | 120.2722 | No stage  | 147.9875 | 0.242522 | 0.37725  |
| <i>MMP7 exon1-2</i> | NM_002423.4 | Normal   | 20       | Stage I   | 3649.235 | 0.000926 | 0.00688  |
| <i>MMP7 exon1-2</i> | NM_002423.4 | Normal   | 20       | Stage II  | 277.8825 | 9.06E-05 | 0.001384 |
| <i>MMP7 exon1-2</i> | NM_002423.4 | Normal   | 20       | Stage III | 382.3    | 1.47E-05 | 0.000916 |
| <i>MMP7 exon1-2</i> | NM_002423.4 | Normal   | 20       | Stage IV  | 120.2722 | 0.000782 | 0.006719 |
| <i>MMP7 exon1-2</i> | NM_002423.4 | Normal   | 20       | No stage  | 147.9875 | 9.06E-05 | 0.001384 |
| <i>MMP7 exon1-2</i> | NM_002423.4 | No stage | 147.9875 | Stage I   | 3649.235 | 0.442617 | 0.484939 |
| <i>MMP7 exon1-2</i> | NM_002423.4 | No stage | 147.9875 | Stage II  | 277.8825 | 0.442617 | 0.484939 |
| <i>MMP7 exon1-2</i> | NM_002423.4 | No stage | 147.9875 | Stage III | 382.3    | 0.307876 | 0.438434 |
| <i>MMP7 exon1-2</i> | NM_002423.4 | No stage | 147.9875 | Stage IV  | 120.2722 | 0.242522 | 0.37725  |
| <i>MMP7 exon1-2</i> | NM_002423.4 | No stage | 147.9875 | Normal    | 20       | 9.06E-05 | 0.001384 |
| <i>MMP9 exon1-2</i> | NM_004994.2 | Stage I  | 367.665  | Stage II  | 6548.393 | 0.156161 | 0.289552 |
| <i>MMP9 exon1-2</i> | NM_004994.2 | Stage I  | 367.665  | Stage III | 7647.711 | 0.230239 | 0.371082 |
| <i>MMP9 exon1-2</i> | NM_004994.2 | Stage I  | 367.665  | Stage IV  | 3684.182 | 0.5      | 0.5      |
| <i>MMP9 exon1-2</i> | NM_004994.2 | Stage I  | 367.665  | Normal    | 20       | 0.000926 | 0.00688  |
| <i>MMP9 exon1-2</i> | NM_004994.2 | Stage I  | 367.665  | No stage  | 232.725  | 0.385752 | 0.478564 |
| <i>MMP9 exon1-2</i> | NM_004994.2 | Stage II | 6548.393 | Stage I   | 367.665  | 0.156161 | 0.289552 |
| <i>MMP9 exon1-2</i> | NM_004994.2 | Stage II | 6548.393 | Stage III | 7647.711 | 0.287618 | 0.422497 |
| <i>MMP9 exon1-2</i> | NM_004994.2 | Stage II | 6548.393 | Stage IV  | 3684.182 | 0.1566   | 0.289552 |
| <i>MMP9 exon1-2</i> | NM_004994.2 | Stage II | 6548.393 | Normal    | 20       | 9.06E-05 | 0.001384 |



|                     |             |           |          |           |          |          |          |
|---------------------|-------------|-----------|----------|-----------|----------|----------|----------|
| <i>MMP9 exon1-2</i> | NM_004994.2 | Stage II  | 6548.393 | No stage  | 232.725  | 0.056176 | 0.169761 |
| <i>MMP9 exon1-2</i> | NM_004994.2 | Stage III | 7647.711 | Stage I   | 367.665  | 0.230239 | 0.371082 |
| <i>MMP9 exon1-2</i> | NM_004994.2 | Stage III | 7647.711 | Stage II  | 6548.393 | 0.287618 | 0.422497 |
| <i>MMP9 exon1-2</i> | NM_004994.2 | Stage III | 7647.711 | Stage IV  | 3684.182 | 0.231685 | 0.371082 |
| <i>MMP9 exon1-2</i> | NM_004994.2 | Stage III | 7647.711 | Normal    | 20       | 7.26E-06 | 0.000916 |
| <i>MMP9 exon1-2</i> | NM_004994.2 | Stage III | 7647.711 | No stage  | 232.725  | 0.092005 | 0.219168 |
| <i>MMP9 exon1-2</i> | NM_004994.2 | Stage IV  | 3684.182 | Stage I   | 367.665  | 0.5      | 0.5      |
| <i>MMP9 exon1-2</i> | NM_004994.2 | Stage IV  | 3684.182 | Stage II  | 6548.393 | 0.1566   | 0.289552 |
| <i>MMP9 exon1-2</i> | NM_004994.2 | Stage IV  | 3684.182 | Stage III | 7647.711 | 0.231685 | 0.371082 |
| <i>MMP9 exon1-2</i> | NM_004994.2 | Stage IV  | 3684.182 | Normal    | 20       | 0.000782 | 0.006719 |
| <i>MMP9 exon1-2</i> | NM_004994.2 | Stage IV  | 3684.182 | No stage  | 232.725  | 0.319391 | 0.441731 |
| <i>MMP9 exon1-2</i> | NM_004994.2 | Normal    | 20       | Stage I   | 367.665  | 0.000926 | 0.00688  |
| <i>MMP9 exon1-2</i> | NM_004994.2 | Normal    | 20       | Stage II  | 6548.393 | 9.06E-05 | 0.001384 |
| <i>MMP9 exon1-2</i> | NM_004994.2 | Normal    | 20       | Stage III | 7647.711 | 7.26E-06 | 0.000916 |
| <i>MMP9 exon1-2</i> | NM_004994.2 | Normal    | 20       | Stage IV  | 3684.182 | 0.000782 | 0.006719 |
| <i>MMP9 exon1-2</i> | NM_004994.2 | Normal    | 20       | No stage  | 232.725  | 0.000926 | 0.00688  |
| <i>MMP9 exon1-2</i> | NM_004994.2 | No stage  | 232.725  | Stage I   | 367.665  | 0.385752 | 0.478564 |
| <i>MMP9 exon1-2</i> | NM_004994.2 | No stage  | 232.725  | Stage II  | 6548.393 | 0.056176 | 0.169761 |
| <i>MMP9 exon1-2</i> | NM_004994.2 | No stage  | 232.725  | Stage III | 7647.711 | 0.092005 | 0.219168 |
| <i>MMP9 exon1-2</i> | NM_004994.2 | No stage  | 232.725  | Stage IV  | 3684.182 | 0.319391 | 0.441731 |
| <i>MMP9 exon1-2</i> | NM_004994.2 | No stage  | 232.725  | Normal    | 20       | 0.000926 | 0.00688  |
| <i>MS4A1</i>        | NM_152866.2 | Stage I   | 18589.93 | Stage II  | 22468.3  | 0.332503 | 0.441731 |

|              |             |           |          |           |          |          |          |
|--------------|-------------|-----------|----------|-----------|----------|----------|----------|
| <i>MS4A1</i> | NM_152866.2 | Stage I   | 18589.93 | Stage III | 17110.81 | 0.5      | 0.5      |
| <i>MS4A1</i> | NM_152866.2 | Stage I   | 18589.93 | Stage IV  | 7012.719 | 0.268267 | 0.400217 |
| <i>MS4A1</i> | NM_152866.2 | Stage I   | 18589.93 | Normal    | 650.3958 | 0.007491 | 0.038567 |
| <i>MS4A1</i> | NM_152866.2 | Stage I   | 18589.93 | No stage  | 12686.44 | 0.442617 | 0.484939 |
| <i>MS4A1</i> | NM_152866.2 | Stage II  | 22468.3  | Stage I   | 18589.93 | 0.332503 | 0.441731 |
| <i>MS4A1</i> | NM_152866.2 | Stage II  | 22468.3  | Stage III | 17110.81 | 0.09236  | 0.219168 |
| <i>MS4A1</i> | NM_152866.2 | Stage II  | 22468.3  | Stage IV  | 7012.719 | 0.026878 | 0.109775 |
| <i>MS4A1</i> | NM_152866.2 | Stage II  | 22468.3  | Normal    | 650.3958 | 0.000529 | 0.005016 |
| <i>MS4A1</i> | NM_152866.2 | Stage II  | 22468.3  | No stage  | 12686.44 | 0.156161 | 0.289552 |
| <i>MS4A1</i> | NM_152866.2 | Stage III | 17110.81 | Stage I   | 18589.93 | 0.5      | 0.5      |
| <i>MS4A1</i> | NM_152866.2 | Stage III | 17110.81 | Stage II  | 22468.3  | 0.09236  | 0.219168 |
| <i>MS4A1</i> | NM_152866.2 | Stage III | 17110.81 | Stage IV  | 7012.719 | 0.069364 | 0.191712 |
| <i>MS4A1</i> | NM_152866.2 | Stage III | 17110.81 | Normal    | 650.3958 | 1.52E-05 | 0.000916 |
| <i>MS4A1</i> | NM_152866.2 | Stage III | 17110.81 | No stage  | 12686.44 | 0.418269 | 0.484939 |
| <i>MS4A1</i> | NM_152866.2 | Stage IV  | 7012.719 | Stage I   | 18589.93 | 0.268267 | 0.400217 |
| <i>MS4A1</i> | NM_152866.2 | Stage IV  | 7012.719 | Stage II  | 22468.3  | 0.026878 | 0.109775 |
| <i>MS4A1</i> | NM_152866.2 | Stage IV  | 7012.719 | Stage III | 17110.81 | 0.069364 | 0.191712 |
| <i>MS4A1</i> | NM_152866.2 | Stage IV  | 7012.719 | Normal    | 650.3958 | 0.002541 | 0.015082 |
| <i>MS4A1</i> | NM_152866.2 | Stage IV  | 7012.719 | No stage  | 12686.44 | 0.07134  | 0.191712 |
| <i>MS4A1</i> | NM_152866.2 | Normal    | 650.3958 | Stage I   | 18589.93 | 0.007491 | 0.038567 |
| <i>MS4A1</i> | NM_152866.2 | Normal    | 650.3958 | Stage II  | 22468.3  | 0.000529 | 0.005016 |
| <i>MS4A1</i> | NM_152866.2 | Normal    | 650.3958 | Stage III | 17110.81 | 1.52E-05 | 0.000916 |

|                    |             |           |          |           |          |          |          |
|--------------------|-------------|-----------|----------|-----------|----------|----------|----------|
| <i>MS4A1</i>       | NM_152866.2 | Normal    | 650.3958 | Stage IV  | 7012.719 | 0.002541 | 0.015082 |
| <i>MS4A1</i>       | NM_152866.2 | Normal    | 650.3958 | No stage  | 12686.44 | 0.000858 | 0.00688  |
| <i>MS4A1</i>       | NM_152866.2 | No stage  | 12686.44 | Stage I   | 18589.93 | 0.442617 | 0.484939 |
| <i>MS4A1</i>       | NM_152866.2 | No stage  | 12686.44 | Stage II  | 22468.3  | 0.156161 | 0.289552 |
| <i>MS4A1</i>       | NM_152866.2 | No stage  | 12686.44 | Stage III | 17110.81 | 0.418269 | 0.484939 |
| <i>MS4A1</i>       | NM_152866.2 | No stage  | 12686.44 | Stage IV  | 7012.719 | 0.07134  | 0.191712 |
| <i>MS4A1</i>       | NM_152866.2 | No stage  | 12686.44 | Normal    | 650.3958 | 0.000858 | 0.00688  |
| <i>MYC exon1-2</i> | NM_002467.4 | Stage I   | 13616.51 | Stage II  | 34941.22 | 0.030301 | 0.119609 |
| <i>MYC exon1-2</i> | NM_002467.4 | Stage I   | 13616.51 | Stage III | 27283.9  | 0.221806 | 0.363796 |
| <i>MYC exon1-2</i> | NM_002467.4 | Stage I   | 13616.51 | Stage IV  | 26276.21 | 0.438602 | 0.484939 |
| <i>MYC exon1-2</i> | NM_002467.4 | Stage I   | 13616.51 | Normal    | 5521.895 | 0.056779 | 0.170957 |
| <i>MYC exon1-2</i> | NM_002467.4 | Stage I   | 13616.51 | No stage  | 15963.85 | 0.442617 | 0.484939 |
| <i>MYC exon1-2</i> | NM_002467.4 | Stage II  | 34941.22 | Stage I   | 13616.51 | 0.030301 | 0.119609 |
| <i>MYC exon1-2</i> | NM_002467.4 | Stage II  | 34941.22 | Stage III | 27283.9  | 0.102596 | 0.22876  |
| <i>MYC exon1-2</i> | NM_002467.4 | Stage II  | 34941.22 | Stage IV  | 26276.21 | 0.094831 | 0.219168 |
| <i>MYC exon1-2</i> | NM_002467.4 | Stage II  | 34941.22 | Normal    | 5521.895 | 0.001716 | 0.011898 |
| <i>MYC exon1-2</i> | NM_002467.4 | Stage II  | 34941.22 | No stage  | 15963.85 | 0.096965 | 0.219168 |
| <i>MYC exon1-2</i> | NM_002467.4 | Stage III | 27283.9  | Stage I   | 13616.51 | 0.221806 | 0.363796 |
| <i>MYC exon1-2</i> | NM_002467.4 | Stage III | 27283.9  | Stage II  | 34941.22 | 0.102596 | 0.22876  |
| <i>MYC exon1-2</i> | NM_002467.4 | Stage III | 27283.9  | Stage IV  | 26276.21 | 0.157515 | 0.289552 |
| <i>MYC exon1-2</i> | NM_002467.4 | Stage III | 27283.9  | Normal    | 5521.895 | 0.000267 | 0.00282  |
| <i>MYC exon1-2</i> | NM_002467.4 | Stage III | 27283.9  | No stage  | 15963.85 | 0.28781  | 0.422497 |

|                    |             |          |          |           |          |          |          |
|--------------------|-------------|----------|----------|-----------|----------|----------|----------|
| <i>MYC exon1-2</i> | NM_002467.4 | Stage IV | 26276.21 | Stage I   | 13616.51 | 0.438602 | 0.484939 |
| <i>MYC exon1-2</i> | NM_002467.4 | Stage IV | 26276.21 | Stage II  | 34941.22 | 0.094831 | 0.219168 |
| <i>MYC exon1-2</i> | NM_002467.4 | Stage IV | 26276.21 | Stage III | 27283.9  | 0.157515 | 0.289552 |
| <i>MYC exon1-2</i> | NM_002467.4 | Stage IV | 26276.21 | Normal    | 5521.895 | 0.038057 | 0.140222 |
| <i>MYC exon1-2</i> | NM_002467.4 | Stage IV | 26276.21 | No stage  | 15963.85 | 0.469251 | 0.490662 |
| <i>MYC exon1-2</i> | NM_002467.4 | Normal   | 5521.895 | Stage I   | 13616.51 | 0.056779 | 0.170957 |
| <i>MYC exon1-2</i> | NM_002467.4 | Normal   | 5521.895 | Stage II  | 34941.22 | 0.001716 | 0.011898 |
| <i>MYC exon1-2</i> | NM_002467.4 | Normal   | 5521.895 | Stage III | 27283.9  | 0.000267 | 0.00282  |
| <i>MYC exon1-2</i> | NM_002467.4 | Normal   | 5521.895 | Stage IV  | 26276.21 | 0.038057 | 0.140222 |
| <i>MYC exon1-2</i> | NM_002467.4 | Normal   | 5521.895 | No stage  | 15963.85 | 0.035501 | 0.136862 |
| <i>MYC exon1-2</i> | NM_002467.4 | No stage | 15963.85 | Stage I   | 13616.51 | 0.442617 | 0.484939 |
| <i>MYC exon1-2</i> | NM_002467.4 | No stage | 15963.85 | Stage II  | 34941.22 | 0.096965 | 0.219168 |
| <i>MYC exon1-2</i> | NM_002467.4 | No stage | 15963.85 | Stage III | 27283.9  | 0.28781  | 0.422497 |
| <i>MYC exon1-2</i> | NM_002467.4 | No stage | 15963.85 | Stage IV  | 26276.21 | 0.469251 | 0.490662 |
| <i>MYC exon1-2</i> | NM_002467.4 | No stage | 15963.85 | Normal    | 5521.895 | 0.035501 | 0.136862 |
| <i>PIP4K2B</i>     | NM_003559.4 | Stage I  | 308.945  | Stage II  | 6175.323 | 0.156161 | 0.289552 |
| <i>PIP4K2B</i>     | NM_003559.4 | Stage I  | 308.945  | Stage III | 1391.916 | 0.476105 | 0.492626 |
| <i>PIP4K2B</i>     | NM_003559.4 | Stage I  | 308.945  | Stage IV  | 1687.758 | 0.372739 | 0.47115  |
| <i>PIP4K2B</i>     | NM_003559.4 | Stage I  | 308.945  | Normal    | 20       | 0.000926 | 0.00688  |
| <i>PIP4K2B</i>     | NM_003559.4 | Stage I  | 308.945  | No stage  | 287.83   | 0.44121  | 0.484939 |
| <i>PIP4K2B</i>     | NM_003559.4 | Stage II | 6175.323 | Stage I   | 308.945  | 0.156161 | 0.289552 |
| <i>PIP4K2B</i>     | NM_003559.4 | Stage II | 6175.323 | Stage III | 1391.916 | 0.064115 | 0.184304 |

|                |             |           |          |           |          |          |          |
|----------------|-------------|-----------|----------|-----------|----------|----------|----------|
| <i>PIP4K2B</i> | NM_003559.4 | Stage II  | 6175.323 | Stage IV  | 1687.758 | 0.088642 | 0.219168 |
| <i>PIP4K2B</i> | NM_003559.4 | Stage II  | 6175.323 | Normal    | 20       | 9.06E-05 | 0.001384 |
| <i>PIP4K2B</i> | NM_003559.4 | Stage II  | 6175.323 | No stage  | 287.83   | 0.154712 | 0.289552 |
| <i>PIP4K2B</i> | NM_003559.4 | Stage III | 1391.916 | Stage I   | 308.945  | 0.476105 | 0.492626 |
| <i>PIP4K2B</i> | NM_003559.4 | Stage III | 1391.916 | Stage II  | 6175.323 | 0.064115 | 0.184304 |
| <i>PIP4K2B</i> | NM_003559.4 | Stage III | 1391.916 | Stage IV  | 1687.758 | 0.243038 | 0.37725  |
| <i>PIP4K2B</i> | NM_003559.4 | Stage III | 1391.916 | Normal    | 20       | 0.000185 | 0.00228  |
| <i>PIP4K2B</i> | NM_003559.4 | Stage III | 1391.916 | No stage  | 287.83   | 0.370123 | 0.47115  |
| <i>PIP4K2B</i> | NM_003559.4 | Stage IV  | 1687.758 | Stage I   | 308.945  | 0.372739 | 0.47115  |
| <i>PIP4K2B</i> | NM_003559.4 | Stage IV  | 1687.758 | Stage II  | 6175.323 | 0.088642 | 0.219168 |
| <i>PIP4K2B</i> | NM_003559.4 | Stage IV  | 1687.758 | Stage III | 1391.916 | 0.243038 | 0.37725  |
| <i>PIP4K2B</i> | NM_003559.4 | Stage IV  | 1687.758 | Normal    | 20       | 0.007431 | 0.038558 |
| <i>PIP4K2B</i> | NM_003559.4 | Stage IV  | 1687.758 | No stage  | 287.83   | 0.337475 | 0.446897 |
| <i>PIP4K2B</i> | NM_003559.4 | Normal    | 20       | Stage I   | 308.945  | 0.000926 | 0.00688  |
| <i>PIP4K2B</i> | NM_003559.4 | Normal    | 20       | Stage II  | 6175.323 | 9.06E-05 | 0.001384 |
| <i>PIP4K2B</i> | NM_003559.4 | Normal    | 20       | Stage III | 1391.916 | 0.000185 | 0.00228  |
| <i>PIP4K2B</i> | NM_003559.4 | Normal    | 20       | Stage IV  | 1687.758 | 0.007431 | 0.038558 |
| <i>PIP4K2B</i> | NM_003559.4 | Normal    | 20       | No stage  | 287.83   | 0.007667 | 0.038567 |
| <i>PIP4K2B</i> | NM_003559.4 | No stage  | 287.83   | Stage I   | 308.945  | 0.44121  | 0.484939 |
| <i>PIP4K2B</i> | NM_003559.4 | No stage  | 287.83   | Stage II  | 6175.323 | 0.154712 | 0.289552 |
| <i>PIP4K2B</i> | NM_003559.4 | No stage  | 287.83   | Stage III | 1391.916 | 0.370123 | 0.47115  |
| <i>PIP4K2B</i> | NM_003559.4 | No stage  | 287.83   | Stage IV  | 1687.758 | 0.337475 | 0.446897 |

|                      |             |           |          |           |          |          |          |
|----------------------|-------------|-----------|----------|-----------|----------|----------|----------|
| <i>PIP4K2B</i>       | NM_003559.4 | No stage  | 287.83   | Normal    | 20       | 0.007667 | 0.038567 |
| <i>PLAUR exon2-3</i> | NM_002659.3 | Stage I   | 565.765  | Stage II  | 12562.74 | 0.015191 | 0.068486 |
| <i>PLAUR exon2-3</i> | NM_002659.3 | Stage I   | 565.765  | Stage III | 6378.578 | 0.062086 | 0.179986 |
| <i>PLAUR exon2-3</i> | NM_002659.3 | Stage I   | 565.765  | Stage IV  | 9516.01  | 0.196727 | 0.338255 |
| <i>PLAUR exon2-3</i> | NM_002659.3 | Stage I   | 565.765  | Normal    | 1035.063 | 0.060794 | 0.178571 |
| <i>PLAUR exon2-3</i> | NM_002659.3 | Stage I   | 565.765  | No stage  | 3826.875 | 0.030301 | 0.119609 |
| <i>PLAUR exon2-3</i> | NM_002659.3 | Stage II  | 12562.74 | Stage I   | 565.765  | 0.015191 | 0.068486 |
| <i>PLAUR exon2-3</i> | NM_002659.3 | Stage II  | 12562.74 | Stage III | 6378.578 | 0.082637 | 0.211506 |
| <i>PLAUR exon2-3</i> | NM_002659.3 | Stage II  | 12562.74 | Stage IV  | 9516.01  | 0.157604 | 0.289552 |
| <i>PLAUR exon2-3</i> | NM_002659.3 | Stage II  | 12562.74 | Normal    | 1035.063 | 0.001368 | 0.0099   |
| <i>PLAUR exon2-3</i> | NM_002659.3 | Stage II  | 12562.74 | No stage  | 3826.875 | 0.096965 | 0.219168 |
| <i>PLAUR exon2-3</i> | NM_002659.3 | Stage III | 6378.578 | Stage I   | 565.765  | 0.062086 | 0.179986 |
| <i>PLAUR exon2-3</i> | NM_002659.3 | Stage III | 6378.578 | Stage II  | 12562.74 | 0.082637 | 0.211506 |
| <i>PLAUR exon2-3</i> | NM_002659.3 | Stage III | 6378.578 | Stage IV  | 9516.01  | 0.441699 | 0.484939 |
| <i>PLAUR exon2-3</i> | NM_002659.3 | Stage III | 6378.578 | Normal    | 1035.063 | 0.000736 | 0.006719 |
| <i>PLAUR exon2-3</i> | NM_002659.3 | Stage III | 6378.578 | No stage  | 3826.875 | 0.488224 | 0.497289 |
| <i>PLAUR exon2-3</i> | NM_002659.3 | Stage IV  | 9516.01  | Stage I   | 565.765  | 0.196727 | 0.338255 |
| <i>PLAUR exon2-3</i> | NM_002659.3 | Stage IV  | 9516.01  | Stage II  | 12562.74 | 0.157604 | 0.289552 |
| <i>PLAUR exon2-3</i> | NM_002659.3 | Stage IV  | 9516.01  | Stage III | 6378.578 | 0.441699 | 0.484939 |
| <i>PLAUR exon2-3</i> | NM_002659.3 | Stage IV  | 9516.01  | Normal    | 1035.063 | 0.006555 | 0.035344 |
| <i>PLAUR exon2-3</i> | NM_002659.3 | Stage IV  | 9516.01  | No stage  | 3826.875 | 0.349641 | 0.450864 |
| <i>PLAUR exon2-3</i> | NM_002659.3 | Normal    | 1035.063 | Stage I   | 565.765  | 0.060794 | 0.178571 |

|                      |             |           |          |           |          |          |          |
|----------------------|-------------|-----------|----------|-----------|----------|----------|----------|
| <i>PLAUR exon2-3</i> | NM_002659.3 | Normal    | 1035.063 | Stage II  | 12562.74 | 0.001368 | 0.0099   |
| <i>PLAUR exon2-3</i> | NM_002659.3 | Normal    | 1035.063 | Stage III | 6378.578 | 0.000736 | 0.006719 |
| <i>PLAUR exon2-3</i> | NM_002659.3 | Normal    | 1035.063 | Stage IV  | 9516.01  | 0.006555 | 0.035344 |
| <i>PLAUR exon2-3</i> | NM_002659.3 | Normal    | 1035.063 | No stage  | 3826.875 | 0.007373 | 0.038558 |
| <i>PLAUR exon2-3</i> | NM_002659.3 | No stage  | 3826.875 | Stage I   | 565.765  | 0.030301 | 0.119609 |
| <i>PLAUR exon2-3</i> | NM_002659.3 | No stage  | 3826.875 | Stage II  | 12562.74 | 0.096965 | 0.219168 |
| <i>PLAUR exon2-3</i> | NM_002659.3 | No stage  | 3826.875 | Stage III | 6378.578 | 0.488224 | 0.497289 |
| <i>PLAUR exon2-3</i> | NM_002659.3 | No stage  | 3826.875 | Stage IV  | 9516.01  | 0.349641 | 0.450864 |
| <i>PLAUR exon2-3</i> | NM_002659.3 | No stage  | 3826.875 | Normal    | 1035.063 | 0.007373 | 0.038558 |
| <i>PTGS2 exon2-3</i> | NM_000963.3 | Stage I   | 27295.66 | Stage II  | 20618.94 | 0.331559 | 0.441731 |
| <i>PTGS2 exon2-3</i> | NM_000963.3 | Stage I   | 27295.66 | Stage III | 25963.25 | 0.440109 | 0.484939 |
| <i>PTGS2 exon2-3</i> | NM_000963.3 | Stage I   | 27295.66 | Stage IV  | 16800.94 | 0.466579 | 0.490662 |
| <i>PTGS2 exon2-3</i> | NM_000963.3 | Stage I   | 27295.66 | Normal    | 20       | 0.007667 | 0.038567 |
| <i>PTGS2 exon2-3</i> | NM_000963.3 | Stage I   | 27295.66 | No stage  | 4420.32  | 0.438891 | 0.484939 |
| <i>PTGS2 exon2-3</i> | NM_000963.3 | Stage II  | 20618.94 | Stage I   | 27295.66 | 0.331559 | 0.441731 |
| <i>PTGS2 exon2-3</i> | NM_000963.3 | Stage II  | 20618.94 | Stage III | 25963.25 | 0.122373 | 0.257458 |
| <i>PTGS2 exon2-3</i> | NM_000963.3 | Stage II  | 20618.94 | Stage IV  | 16800.94 | 0.116936 | 0.253875 |
| <i>PTGS2 exon2-3</i> | NM_000963.3 | Stage II  | 20618.94 | Normal    | 20       | 9.06E-05 | 0.001384 |
| <i>PTGS2 exon2-3</i> | NM_000963.3 | Stage II  | 20618.94 | No stage  | 4420.32  | 0.154712 | 0.289552 |
| <i>PTGS2 exon2-3</i> | NM_000963.3 | Stage III | 25963.25 | Stage I   | 27295.66 | 0.440109 | 0.484939 |
| <i>PTGS2 exon2-3</i> | NM_000963.3 | Stage III | 25963.25 | Stage II  | 20618.94 | 0.122373 | 0.257458 |
| <i>PTGS2 exon2-3</i> | NM_000963.3 | Stage III | 25963.25 | Stage IV  | 16800.94 | 0.318945 | 0.441731 |

|                       |             |           |          |           |          |          |          |
|-----------------------|-------------|-----------|----------|-----------|----------|----------|----------|
| <i>PTGS2 exon2-3</i>  | NM_000963.3 | Stage III | 25963.25 | Normal    | 20       | 0.000185 | 0.00228  |
| <i>PTGS2 exon2-3</i>  | NM_000963.3 | Stage III | 25963.25 | No stage  | 4420.32  | 0.3042   | 0.437221 |
| <i>PTGS2 exon2-3</i>  | NM_000963.3 | Stage IV  | 16800.94 | Stage I   | 27295.66 | 0.466579 | 0.490662 |
| <i>PTGS2 exon2-3</i>  | NM_000963.3 | Stage IV  | 16800.94 | Stage II  | 20618.94 | 0.116936 | 0.253875 |
| <i>PTGS2 exon2-3</i>  | NM_000963.3 | Stage IV  | 16800.94 | Stage III | 25963.25 | 0.318945 | 0.441731 |
| <i>PTGS2 exon2-3</i>  | NM_000963.3 | Stage IV  | 16800.94 | Normal    | 20       | 0.007431 | 0.038558 |
| <i>PTGS2 exon2-3</i>  | NM_000963.3 | Stage IV  | 16800.94 | No stage  | 4420.32  | 0.466579 | 0.490662 |
| <i>PTGS2 exon2-3</i>  | NM_000963.3 | Normal    | 20       | Stage I   | 27295.66 | 0.007667 | 0.038567 |
| <i>PTGS2 exon2-3</i>  | NM_000963.3 | Normal    | 20       | Stage II  | 20618.94 | 9.06E-05 | 0.001384 |
| <i>PTGS2 exon2-3</i>  | NM_000963.3 | Normal    | 20       | Stage III | 25963.25 | 0.000185 | 0.00228  |
| <i>PTGS2 exon2-3</i>  | NM_000963.3 | Normal    | 20       | Stage IV  | 16800.94 | 0.007431 | 0.038558 |
| <i>PTGS2 exon2-3</i>  | NM_000963.3 | Normal    | 20       | No stage  | 4420.32  | 0.007667 | 0.038567 |
| <i>PTGS2 exon2-3</i>  | NM_000963.3 | No stage  | 4420.32  | Stage I   | 27295.66 | 0.438891 | 0.484939 |
| <i>PTGS2 exon2-3</i>  | NM_000963.3 | No stage  | 4420.32  | Stage II  | 20618.94 | 0.154712 | 0.289552 |
| <i>PTGS2 exon2-3</i>  | NM_000963.3 | No stage  | 4420.32  | Stage III | 25963.25 | 0.3042   | 0.437221 |
| <i>PTGS2 exon2-3</i>  | NM_000963.3 | No stage  | 4420.32  | Stage IV  | 16800.94 | 0.466579 | 0.490662 |
| <i>PTGS2 exon2-3</i>  | NM_000963.3 | No stage  | 4420.32  | Normal    | 20       | 0.007667 | 0.038567 |
| <i>SI00A4 exon3-4</i> | NM_019554.2 | Stage I   | 33689    | Stage II  | 44015.95 | 0.332503 | 0.441731 |
| <i>SI00A4 exon3-4</i> | NM_019554.2 | Stage I   | 33689    | Stage III | 37234.61 | 0.464784 | 0.490662 |
| <i>SI00A4 exon3-4</i> | NM_019554.2 | Stage I   | 33689    | Stage IV  | 25325.74 | 0.198033 | 0.338255 |
| <i>SI00A4 exon3-4</i> | NM_019554.2 | Stage I   | 33689    | Normal    | 18203.82 | 0.07132  | 0.191712 |
| <i>SI00A4 exon3-4</i> | NM_019554.2 | Stage I   | 33689    | No stage  | 26682.23 | 0.235243 | 0.371082 |



|                       |             |           |          |           |          |          |          |
|-----------------------|-------------|-----------|----------|-----------|----------|----------|----------|
| <i>S100A4 exon3-4</i> | NM_019554.2 | Stage II  | 44015.95 | Stage I   | 33689    | 0.332503 | 0.441731 |
| <i>S100A4 exon3-4</i> | NM_019554.2 | Stage II  | 44015.95 | Stage III | 37234.61 | 0.092449 | 0.219168 |
| <i>S100A4 exon3-4</i> | NM_019554.2 | Stage II  | 44015.95 | Stage IV  | 25325.74 | 0.037991 | 0.140222 |
| <i>S100A4 exon3-4</i> | NM_019554.2 | Stage II  | 44015.95 | Normal    | 18203.82 | 0.006327 | 0.034343 |
| <i>S100A4 exon3-4</i> | NM_019554.2 | Stage II  | 44015.95 | No stage  | 26682.23 | 0.056176 | 0.169761 |
| <i>S100A4 exon3-4</i> | NM_019554.2 | Stage III | 37234.61 | Stage I   | 33689    | 0.464784 | 0.490662 |
| <i>S100A4 exon3-4</i> | NM_019554.2 | Stage III | 37234.61 | Stage II  | 44015.95 | 0.092449 | 0.219168 |
| <i>S100A4 exon3-4</i> | NM_019554.2 | Stage III | 37234.61 | Stage IV  | 25325.74 | 0.03975  | 0.143206 |
| <i>S100A4 exon3-4</i> | NM_019554.2 | Stage III | 37234.61 | Normal    | 18203.82 | 0.001827 | 0.012458 |
| <i>S100A4 exon3-4</i> | NM_019554.2 | Stage III | 37234.61 | No stage  | 26682.23 | 0.18053  | 0.322218 |
| <i>S100A4 exon3-4</i> | NM_019554.2 | Stage IV  | 25325.74 | Stage I   | 33689    | 0.198033 | 0.338255 |
| <i>S100A4 exon3-4</i> | NM_019554.2 | Stage IV  | 25325.74 | Stage II  | 44015.95 | 0.037991 | 0.140222 |
| <i>S100A4 exon3-4</i> | NM_019554.2 | Stage IV  | 25325.74 | Stage III | 37234.61 | 0.03975  | 0.143206 |
| <i>S100A4 exon3-4</i> | NM_019554.2 | Stage IV  | 25325.74 | Normal    | 18203.82 | 0.296776 | 0.427555 |
| <i>S100A4 exon3-4</i> | NM_019554.2 | Stage IV  | 25325.74 | No stage  | 26682.23 | 0.469251 | 0.490662 |
| <i>S100A4 exon3-4</i> | NM_019554.2 | Normal    | 18203.82 | Stage I   | 33689    | 0.07132  | 0.191712 |
| <i>S100A4 exon3-4</i> | NM_019554.2 | Normal    | 18203.82 | Stage II  | 44015.95 | 0.006327 | 0.034343 |
| <i>S100A4 exon3-4</i> | NM_019554.2 | Normal    | 18203.82 | Stage III | 37234.61 | 0.001827 | 0.012458 |
| <i>S100A4 exon3-4</i> | NM_019554.2 | Normal    | 18203.82 | Stage IV  | 25325.74 | 0.296776 | 0.427555 |
| <i>S100A4 exon3-4</i> | NM_019554.2 | Normal    | 18203.82 | No stage  | 26682.23 | 0.214598 | 0.35733  |
| <i>S100A4 exon3-4</i> | NM_019554.2 | No stage  | 26682.23 | Stage I   | 33689    | 0.235243 | 0.371082 |
| <i>S100A4 exon3-4</i> | NM_019554.2 | No stage  | 26682.23 | Stage II  | 44015.95 | 0.056176 | 0.169761 |

|                       |             |           |          |           |          |          |          |
|-----------------------|-------------|-----------|----------|-----------|----------|----------|----------|
| <i>SI00A4 exon3-4</i> | NM_019554.2 | No stage  | 26682.23 | Stage III | 37234.61 | 0.18053  | 0.322218 |
| <i>SI00A4 exon3-4</i> | NM_019554.2 | No stage  | 26682.23 | Stage IV  | 25325.74 | 0.469251 | 0.490662 |
| <i>SI00A4 exon3-4</i> | NM_019554.2 | No stage  | 26682.23 | Normal    | 18203.82 | 0.214598 | 0.35733  |
| <i>TRIM24</i>         | NM_015905.2 | Stage I   | 592.65   | Stage II  | 8514.685 | 0.156161 | 0.289552 |
| <i>TRIM24</i>         | NM_015905.2 | Stage I   | 592.65   | Stage III | 7197.833 | 0.041017 | 0.146654 |
| <i>TRIM24</i>         | NM_015905.2 | Stage I   | 592.65   | Stage IV  | 3787.37  | 0.044596 | 0.156561 |
| <i>TRIM24</i>         | NM_015905.2 | Stage I   | 592.65   | Normal    | 20       | 0.000926 | 0.00688  |
| <i>TRIM24</i>         | NM_015905.2 | Stage I   | 592.65   | No stage  | 456.5675 | 0.332503 | 0.441731 |
| <i>TRIM24</i>         | NM_015905.2 | Stage II  | 8514.685 | Stage I   | 592.65   | 0.156161 | 0.289552 |
| <i>TRIM24</i>         | NM_015905.2 | Stage II  | 8514.685 | Stage III | 7197.833 | 0.372922 | 0.47115  |
| <i>TRIM24</i>         | NM_015905.2 | Stage II  | 8514.685 | Stage IV  | 3787.37  | 0.469251 | 0.490662 |
| <i>TRIM24</i>         | NM_015905.2 | Stage II  | 8514.685 | Normal    | 20       | 9.06E-05 | 0.001384 |
| <i>TRIM24</i>         | NM_015905.2 | Stage II  | 8514.685 | No stage  | 456.5675 | 0.156161 | 0.289552 |
| <i>TRIM24</i>         | NM_015905.2 | Stage III | 7197.833 | Stage I   | 592.65   | 0.041017 | 0.146654 |
| <i>TRIM24</i>         | NM_015905.2 | Stage III | 7197.833 | Stage II  | 8514.685 | 0.372922 | 0.47115  |
| <i>TRIM24</i>         | NM_015905.2 | Stage III | 7197.833 | Stage IV  | 3787.37  | 0.343854 | 0.450864 |
| <i>TRIM24</i>         | NM_015905.2 | Stage III | 7197.833 | Normal    | 20       | 1.60E-06 | 0.000916 |
| <i>TRIM24</i>         | NM_015905.2 | Stage III | 7197.833 | No stage  | 456.5675 | 0.041063 | 0.146654 |
| <i>TRIM24</i>         | NM_015905.2 | Stage IV  | 3787.37  | Stage I   | 592.65   | 0.044596 | 0.156561 |
| <i>TRIM24</i>         | NM_015905.2 | Stage IV  | 3787.37  | Stage II  | 8514.685 | 0.469251 | 0.490662 |
| <i>TRIM24</i>         | NM_015905.2 | Stage IV  | 3787.37  | Stage III | 7197.833 | 0.343854 | 0.450864 |
| <i>TRIM24</i>         | NM_015905.2 | Stage IV  | 3787.37  | Normal    | 20       | 5.60E-05 | 0.001384 |

|               |             |           |          |           |          |          |          |
|---------------|-------------|-----------|----------|-----------|----------|----------|----------|
| <i>TRIM24</i> | NM_015905.2 | Stage IV  | 3787.37  | No stage  | 456.5675 | 0.026878 | 0.109775 |
| <i>TRIM24</i> | NM_015905.2 | Normal    | 20       | Stage I   | 592.65   | 0.000926 | 0.00688  |
| <i>TRIM24</i> | NM_015905.2 | Normal    | 20       | Stage II  | 8514.685 | 9.06E-05 | 0.001384 |
| <i>TRIM24</i> | NM_015905.2 | Normal    | 20       | Stage III | 7197.833 | 1.60E-06 | 0.000916 |
| <i>TRIM24</i> | NM_015905.2 | Normal    | 20       | Stage IV  | 3787.37  | 5.60E-05 | 0.001384 |
| <i>TRIM24</i> | NM_015905.2 | Normal    | 20       | No stage  | 456.5675 | 9.06E-05 | 0.001384 |
| <i>TRIM24</i> | NM_015905.2 | No stage  | 456.5675 | Stage I   | 592.65   | 0.332503 | 0.441731 |
| <i>TRIM24</i> | NM_015905.2 | No stage  | 456.5675 | Stage II  | 8514.685 | 0.156161 | 0.289552 |
| <i>TRIM24</i> | NM_015905.2 | No stage  | 456.5675 | Stage III | 7197.833 | 0.041063 | 0.146654 |
| <i>TRIM24</i> | NM_015905.2 | No stage  | 456.5675 | Stage IV  | 3787.37  | 0.026878 | 0.109775 |
| <i>TRIM24</i> | NM_015905.2 | No stage  | 456.5675 | Normal    | 20       | 9.06E-05 | 0.001384 |
| <i>TUG1</i>   | NR_002323.1 | Stage I   | 975.32   | Stage II  | 5631.128 | 0.056176 | 0.169761 |
| <i>TUG1</i>   | NR_002323.1 | Stage I   | 975.32   | Stage III | 8363.993 | 0.195958 | 0.338255 |
| <i>TUG1</i>   | NR_002323.1 | Stage I   | 975.32   | Stage IV  | 21629.69 | 0.108206 | 0.238689 |
| <i>TUG1</i>   | NR_002323.1 | Stage I   | 975.32   | Normal    | 2689.192 | 0.060794 | 0.178571 |
| <i>TUG1</i>   | NR_002323.1 | Stage I   | 975.32   | No stage  | 493.98   | 0.385752 | 0.478564 |
| <i>TUG1</i>   | NR_002323.1 | Stage II  | 5631.128 | Stage I   | 975.32   | 0.056176 | 0.169761 |
| <i>TUG1</i>   | NR_002323.1 | Stage II  | 5631.128 | Stage III | 8363.993 | 0.212929 | 0.35733  |
| <i>TUG1</i>   | NR_002323.1 | Stage II  | 5631.128 | Stage IV  | 21629.69 | 0.349838 | 0.450864 |
| <i>TUG1</i>   | NR_002323.1 | Stage II  | 5631.128 | Normal    | 2689.192 | 0.010746 | 0.051846 |
| <i>TUG1</i>   | NR_002323.1 | Stage II  | 5631.128 | No stage  | 493.98   | 0.056176 | 0.169761 |
| <i>TUG1</i>   | NR_002323.1 | Stage III | 8363.993 | Stage I   | 975.32   | 0.195958 | 0.338255 |

|                     |             |           |          |           |          |          |          |
|---------------------|-------------|-----------|----------|-----------|----------|----------|----------|
| <i>TUG1</i>         | NR_002323.1 | Stage III | 8363.993 | Stage II  | 5631.128 | 0.212929 | 0.35733  |
| <i>TUG1</i>         | NR_002323.1 | Stage III | 8363.993 | Stage IV  | 21629.69 | 0.279179 | 0.412764 |
| <i>TUG1</i>         | NR_002323.1 | Stage III | 8363.993 | Normal    | 2689.192 | 0.001192 | 0.008783 |
| <i>TUG1</i>         | NR_002323.1 | Stage III | 8363.993 | No stage  | 493.98   | 0.113059 | 0.247576 |
| <i>TUG1</i>         | NR_002323.1 | Stage IV  | 21629.69 | Stage I   | 975.32   | 0.108206 | 0.238689 |
| <i>TUG1</i>         | NR_002323.1 | Stage IV  | 21629.69 | Stage II  | 5631.128 | 0.349838 | 0.450864 |
| <i>TUG1</i>         | NR_002323.1 | Stage IV  | 21629.69 | Stage III | 8363.993 | 0.279179 | 0.412764 |
| <i>TUG1</i>         | NR_002323.1 | Stage IV  | 21629.69 | Normal    | 2689.192 | 0.005063 | 0.027847 |
| <i>TUG1</i>         | NR_002323.1 | Stage IV  | 21629.69 | No stage  | 493.98   | 0.061154 | 0.178908 |
| <i>TUG1</i>         | NR_002323.1 | Normal    | 2689.192 | Stage I   | 975.32   | 0.060794 | 0.178571 |
| <i>TUG1</i>         | NR_002323.1 | Normal    | 2689.192 | Stage II  | 5631.128 | 0.010746 | 0.051846 |
| <i>TUG1</i>         | NR_002323.1 | Normal    | 2689.192 | Stage III | 8363.993 | 0.001192 | 0.008783 |
| <i>TUG1</i>         | NR_002323.1 | Normal    | 2689.192 | Stage IV  | 21629.69 | 0.005063 | 0.027847 |
| <i>TUG1</i>         | NR_002323.1 | Normal    | 2689.192 | No stage  | 493.98   | 0.060794 | 0.178571 |
| <i>TUG1</i>         | NR_002323.1 | No stage  | 493.98   | Stage I   | 975.32   | 0.385752 | 0.478564 |
| <i>TUG1</i>         | NR_002323.1 | No stage  | 493.98   | Stage II  | 5631.128 | 0.056176 | 0.169761 |
| <i>TUG1</i>         | NR_002323.1 | No stage  | 493.98   | Stage III | 8363.993 | 0.113059 | 0.247576 |
| <i>TUG1</i>         | NR_002323.1 | No stage  | 493.98   | Stage IV  | 21629.69 | 0.061154 | 0.178908 |
| <i>TUG1</i>         | NR_002323.1 | No stage  | 493.98   | Normal    | 2689.192 | 0.060794 | 0.178571 |
| <i>TYMS exon2-3</i> | NM_001071.2 | Stage I   | 30818.32 | Stage II  | 50162.11 | 0.235243 | 0.371082 |
| <i>TYMS exon2-3</i> | NM_001071.2 | Stage I   | 30818.32 | Stage III | 39236.93 | 0.418302 | 0.484939 |
| <i>TYMS exon2-3</i> | NM_001071.2 | Stage I   | 30818.32 | Stage IV  | 33363.06 | 0.378649 | 0.47475  |

|                     |             |           |          |           |          |          |          |
|---------------------|-------------|-----------|----------|-----------|----------|----------|----------|
| <i>TYMS exon2-3</i> | NM_001071.2 | Stage I   | 30818.32 | Normal    | 13571.37 | 0.098099 | 0.221124 |
| <i>TYMS exon2-3</i> | NM_001071.2 | Stage I   | 30818.32 | No stage  | 32978.77 | 0.442617 | 0.484939 |
| <i>TYMS exon2-3</i> | NM_001071.2 | Stage II  | 50162.11 | Stage I   | 30818.32 | 0.235243 | 0.371082 |
| <i>TYMS exon2-3</i> | NM_001071.2 | Stage II  | 50162.11 | Stage III | 39236.93 | 0.213163 | 0.35733  |
| <i>TYMS exon2-3</i> | NM_001071.2 | Stage II  | 50162.11 | Stage IV  | 33363.06 | 0.198033 | 0.338255 |
| <i>TYMS exon2-3</i> | NM_001071.2 | Stage II  | 50162.11 | Normal    | 13571.37 | 0.038242 | 0.140222 |
| <i>TYMS exon2-3</i> | NM_001071.2 | Stage II  | 50162.11 | No stage  | 32978.77 | 0.235243 | 0.371082 |
| <i>TYMS exon2-3</i> | NM_001071.2 | Stage III | 39236.93 | Stage I   | 30818.32 | 0.418302 | 0.484939 |
| <i>TYMS exon2-3</i> | NM_001071.2 | Stage III | 39236.93 | Stage II  | 50162.11 | 0.213163 | 0.35733  |
| <i>TYMS exon2-3</i> | NM_001071.2 | Stage III | 39236.93 | Stage IV  | 33363.06 | 0.088232 | 0.219168 |
| <i>TYMS exon2-3</i> | NM_001071.2 | Stage III | 39236.93 | Normal    | 13571.37 | 0.000219 | 0.002568 |
| <i>TYMS exon2-3</i> | NM_001071.2 | Stage III | 39236.93 | No stage  | 32978.77 | 0.464784 | 0.490662 |
| <i>TYMS exon2-3</i> | NM_001071.2 | Stage IV  | 33363.06 | Stage I   | 30818.32 | 0.378649 | 0.47475  |
| <i>TYMS exon2-3</i> | NM_001071.2 | Stage IV  | 33363.06 | Stage II  | 50162.11 | 0.198033 | 0.338255 |
| <i>TYMS exon2-3</i> | NM_001071.2 | Stage IV  | 33363.06 | Stage III | 39236.93 | 0.088232 | 0.219168 |
| <i>TYMS exon2-3</i> | NM_001071.2 | Stage IV  | 33363.06 | Normal    | 13571.37 | 0.105317 | 0.232939 |
| <i>TYMS exon2-3</i> | NM_001071.2 | Stage IV  | 33363.06 | No stage  | 32978.77 | 0.198033 | 0.338255 |
| <i>TYMS exon2-3</i> | NM_001071.2 | Normal    | 13571.37 | Stage I   | 30818.32 | 0.098099 | 0.221124 |
| <i>TYMS exon2-3</i> | NM_001071.2 | Normal    | 13571.37 | Stage II  | 50162.11 | 0.038242 | 0.140222 |
| <i>TYMS exon2-3</i> | NM_001071.2 | Normal    | 13571.37 | Stage III | 39236.93 | 0.000219 | 0.002568 |
| <i>TYMS exon2-3</i> | NM_001071.2 | Normal    | 13571.37 | Stage IV  | 33363.06 | 0.105317 | 0.232939 |
| <i>TYMS exon2-3</i> | NM_001071.2 | Normal    | 13571.37 | No stage  | 32978.77 | 0.01626  | 0.071734 |

|                     |             |          |          |           |          |          |          |
|---------------------|-------------|----------|----------|-----------|----------|----------|----------|
| <i>TYMS exon2-3</i> | NM_001071.2 | No stage | 32978.77 | Stage I   | 30818.32 | 0.442617 | 0.484939 |
| <i>TYMS exon2-3</i> | NM_001071.2 | No stage | 32978.77 | Stage II  | 50162.11 | 0.235243 | 0.371082 |
| <i>TYMS exon2-3</i> | NM_001071.2 | No stage | 32978.77 | Stage III | 39236.93 | 0.464784 | 0.490662 |
| <i>TYMS exon2-3</i> | NM_001071.2 | No stage | 32978.77 | Stage IV  | 33363.06 | 0.198033 | 0.338255 |
| <i>TYMS exon2-3</i> | NM_001071.2 | No stage | 32978.77 | Normal    | 13571.37 | 0.01626  | 0.071734 |

\*adjusted p-value using Benjamini-Hochberg procedure
