# Supplementary material for: Plasma Circulating mRNA Profile for the Non-Invasive Diagnosis of Colorectal Cancer Using NanoString Technologies
Source: MDPI journal article supplement (doi:10.3390/ijms25053012), 2024-03-05
Supplement: s1 [file s1]

**Supplementary Table S1.** Target sequences of the CodeSet used in the customized circulating mRNA markers panel.

| Gene                                                                                                  | Accession      | Position  |
|-------------------------------------------------------------------------------------------------------|----------------|-----------|
| <i>ACTB</i>                                                                                           | NM_001101.2    | 1011-1110 |
| Target sequence:                                                                                      |                |           |
| TGCAGAAGGAGATCACTGCCCTGGCACCCAGCACAAATGAAGATCAAGATCATTGCTCCTCCTGAGCGCAAGTACTCCGTGTGGATCGGCGGCTCCATCCT |                |           |
| Gene                                                                                                  | Accession      | Position  |
| <i>BANK1</i>                                                                                          | NM_001083907.1 | 1396-1495 |
| Target sequence:                                                                                      |                |           |
| GGCAAATGAAATGGAAGGGGAAGGAAAACAGAATGGATCAGGCATGGAGACCAAACACAGCCCACTAGAGGTTGGCAGTGAGAGTTCTGAAGACCAG     |                |           |
| TAT                                                                                                   |                |           |

---

| Gene       | Accession   | Position  |
|------------|-------------|-----------|
| <i>BGN</i> | NM_001711.3 | 1936-2035 |

---

**Target sequence:**

TGTGTCTTGTGCTTCCTCAGACCTTTCTCGCTTCTGAGCTTGGTGGCCTGTTCCCTCCATCTCTCCGAACCTGGCTTCGCCTGTCCCTTTCCTCCACAC

---

---

| Gene       | Accession   | Position |
|------------|-------------|----------|
| <i>CDA</i> | NM_001785.2 | 323-422  |

---

**Target sequence:**

AATCTTCAAAGGGTGCAACATAGAAAATGCCTGCTACCCGCTGGGCATCTGTGCTGAACGGACCGCTATCCAGAAGGCCGTCTCAGAAGGGTACAAGGAT

---

| Gene           | Accession   | Position |
|----------------|-------------|----------|
| <i>CEACAM7</i> | NM_006890.4 | 200-299  |

**Target sequence:**

CTGCCAAACAGTGCCCAGACCAATATTGATGTCGTGCCGTTCAATGTCGCAGAAGGGAAGGAGGTCCTTCTAGTAGTCCATAATGAGTCCCAGAATCTTT

| Gene         | Accession   | Position |
|--------------|-------------|----------|
| <i>CEMIP</i> | NM_018689.1 | 846-945  |

**Target sequence:**

CCCAAATCAGGCACAGTCATCCATTCTGACCGGTTTGACACCTATAGATCCAAGAAAGAGAGTGAACGTCTGGTCCAGTATTTGAACGCGGTGCCCGATG

| Gene | Accession | Position |
|------|-----------|----------|
|------|-----------|----------|

---

|              |                |         |
|--------------|----------------|---------|
| <i>CTNNB</i> | NM_001098210.1 | 120-219 |
|--------------|----------------|---------|

---

**Target sequence:**

GACGGAGGAAGGTCTGAGGAGCAGCTTCAGTCCCCGCCGAGCCGCCACCGCAGGTCGAGGACGGTCGGACTCCCGCGGCGGGAGGAGCCTGTTCCCC  
TGA

---

---

| Gene        | Accession   | Position  |
|-------------|-------------|-----------|
| <i>CTSL</i> | NM_001912.4 | 1073-1172 |

---

**Target sequence:**

TGTGGGGCCCATTTCTGTTGCTATTGATGCAGGTCATGAGTCCTTCCTGTTCTATAAAGAAGGCATTTATTTTGAGCCAGACTGTAGCAGTGAAGACATG

---

---

| Gene | Accession | Position |
|------|-----------|----------|
|------|-----------|----------|

---

|              |             |           |
|--------------|-------------|-----------|
| <i>EPAS1</i> | NM_001430.3 | 4247-4346 |
|--------------|-------------|-----------|

**Target sequence:**

TGCACTGAGCTATGTGACTCGGATGGTCTTTCACACGGCACATTTGGACATTTCCAGAACTACCATGAGATGGTTTAGACGGGAATTCATGCAAATGAGG

| Gene           | Accession   | Position |
|----------------|-------------|----------|
| <i>FAM129C</i> | NM_173544.4 | 573-672  |

**Target sequence:**

CTCAACAGCCCTGACAGGATACACGCTCCTGACTTCCCAGCGAGAATATCTCCGCCTTTTGGATGCTCTCTGCCCTGAATCCTTGGGAGACCATACTCAG

| Gene       | Accession   | Position  |
|------------|-------------|-----------|
| <i>FAP</i> | NM_004460.2 | 1491-1590 |

---

**Target sequence:**

GCATTGGAAGCTATCCTCCAAGCAAGAAGTGTGTTACTTGCCATCTAAGGAAAGAAAGGTGCCAATATTACACAGCAAGTTTCAGCGACTACGCCAAGTA

---

---

| Gene      | Accession   | Position  |
|-----------|-------------|-----------|
| <i>GK</i> | NM_000167.3 | 1506-1605 |

---

**Target sequence:**

GGGCTGCAGAAGGAGTCGGCGTATGGAGTCTCGAACCCGAGGATTTGTCTGCCGTACGATGGAGCGGTTTGAACCTCAGATTAATGCGGAGGAAAGTG

A

---

---

| Gene          | Accession   | Position  |
|---------------|-------------|-----------|
| <i>GUCY2C</i> | NM_004963.1 | 1841-1940 |

---

---

**Target sequence:**

CTAAGGGAATGTCATATCTGCACTCCAGTAAGACAGAAAGTCCATGGTCGTCTGAAATCTACCAACTGCGTAGTGGACAGTAGAATGGTGGTGAAGATCAC

---

---

| Gene         | Accession   | Position |
|--------------|-------------|----------|
| <i>INHBA</i> | NM_002192.2 | 491-590  |

---

**Target sequence:**

GCGCTTCTGAACGCGATCAGAAAGCTTCATGTGGGCAAAGTCGGGGAGAACGGGTATGTGGAGATAGAGGATGACATTGGAAGGAGGGCAGAAATGAA

TG

---

---

| Gene         | Accession   | Position |
|--------------|-------------|----------|
| <i>KRT19</i> | NM_002276.4 | 139-238  |

---

---

**Target sequence:**

CGCCATGACTTCCTACAGCTATCGCCAGTCGTCGGCCACGTCGTCCTTCGGAGGCCTGGGCGGCGGCTCCGTGCGTTTTGGGCCGGGGGTCGCCTTTCGC

---

---

| Gene         | Accession   | Position |
|--------------|-------------|----------|
| <i>KRT20</i> | NM_019010.2 | 54-153   |

---

**Target sequence:**

CTCCAATGGATTTTCAGTCGCAGAAGCTTCCACAGAAGCCTGAGCTCCTCCTTGCAGGCCCTGTAGTCAGTACAGTGGGCATGCAGCGCCTCGGGACGA

C

---

---

| Gene         | Accession   | Position  |
|--------------|-------------|-----------|
| <i>MKI67</i> | NM_002417.2 | 4021-4120 |

---



---

**Target sequence:**

AGCAGATGTAGAGGGAGAACTCTTAGCGTGCAGGAATCTAATGCCATCAGCAGGCAAAGCCATGCACACGCCTAAACCATCAGTAGGTGAAGAGAAAG  
AC

---

---

| Gene        | Accession   | Position |
|-------------|-------------|----------|
| <i>MMP7</i> | NM_002423.4 | 125-224  |

---

**Target sequence:**

GGGAGGCATGAGTGAGCTACAGTGGGAACAGGCTCAGGACTATCTCAAGAGATTTTATCTCTATGACTCAGAAACAAAAAATGCCAACAGTTTAGAAGCC

---

---

| Gene        | Accession   | Position |
|-------------|-------------|----------|
| <i>MMP9</i> | NM_004994.2 | 181-280  |

---

---

**Target sequence:**

CACTCGGGTGGCAGAGATGCGTGGAGAGTCGAAATCTCTGGGGCCTGCGCTGCTGCTTCTCCAGAAGCAACTGTCCCTGCCCAGACCGGTGAGCTGGAT

---

---

| Gene         | Accession   | Position |
|--------------|-------------|----------|
| <i>MS4A1</i> | NM_152866.2 | 621-720  |

---

**Target sequence:**

CTTCTGATGATCCCAGCAGGGATCTATGCACCCATCTGTGTGACTGTGTGGTACCCTCTCTGGGGAGGCATTATGTATATTATTTCCGGATCACTCCTGG

---

---

| Gene       | Accession   | Position |
|------------|-------------|----------|
| <i>MYC</i> | NM_002467.4 | 532-631  |

---

**Target sequence:**

---

---

TTTTTTCGGGTAGTGGAAAACCAGCAGCCTCCCGCGACGATGCCCCTCAACGTTAGCTTCACCAACAGGAACTATGACCTCGACTACGACTCGGTGCAGC

---

---

| Gene | Accession | Position |
|------|-----------|----------|
|------|-----------|----------|

---

|                |             |           |
|----------------|-------------|-----------|
| <i>PIP4K2B</i> | NM_003559.4 | 2691-2790 |
|----------------|-------------|-----------|

---

**Target sequence:**

ATGAGGCCCTGTGCCCTCGATCTATTTCTTCTTCCTTCTGACCTCCTCCCAGGCACTCTTACTTCTAGCCGAACTCTTAGCTCTGGGCAGATCTCCAAG

---

---

| Gene | Accession | Position |
|------|-----------|----------|
|------|-----------|----------|

---

|              |             |         |
|--------------|-------------|---------|
| <i>PLAUR</i> | NM_002659.3 | 405-504 |
|--------------|-------------|---------|

---

**Target sequence:**

TGGAGCTGGTGGAGAAAAGCTGTACCCACTCAGAGAAGACCAACAGGACCCTGAGCTATCGGACTGGCTTGAAGATCACCAGCCTTACCGAGGTTGTGTG

---

| Gene         | Accession   | Position |
|--------------|-------------|----------|
| <i>PTGS2</i> | NM_000963.3 | 220-319  |

**Target sequence:**

ACCGAGGTGTATGTATGAGTGTGGGATTTGACCAGTATAAGTGCGATTGTACCCGGACAGGATTCTATGGAGAAAAGTCTCAACACCGGAATTTTGGAC

| Gene          | Accession   | Position |
|---------------|-------------|----------|
| <i>S100A4</i> | NM_019554.2 | 379-478  |

**Target sequence:**

CGAATTCTTTGAAGGCTTCCCAGATAAGCAGCCCAGGAAGAAATGAAAAGTCCTCTGATGTGGTTGGGGGGTCTGCCAGCTGGGGCCCTCCCTGTCGCCA

| Gene          | Accession   | Position |
|---------------|-------------|----------|
| <i>TRIM24</i> | NM_015905.2 | 541-640  |

**Target sequence:**

GCTCGCCGGTCAGCGGCTCGTCGCCGTTGCCACCCAAGTTGGAGTCATTGTTGCCAGTTTGCAGCCAAGAATGTGCAGAGAGACACATCATAGATAA

| Gene        | Accession   | Position  |
|-------------|-------------|-----------|
| <i>TUG1</i> | NR_002323.1 | 2602-2701 |

**Target sequence:**

ACATCTAGGATCCCGTGAAGGTCACCTGGACCCTGTTTTTCTACTTCAAATCCTGTAGTAGCCTACTGAATGAGAAAACATATTCTGACCCATTGGGATC

| Gene | Accession | Position |
|------|-----------|----------|
|------|-----------|----------|

---

*TYMS*

NM\_001071.2

356-455

---

**Target sequence:**

CTGCTGACAACCAAACGTGTGTTCTGGAAGGGTGTGTTGGAGGAGTTGCTGTGGTTTATCAAGGGATCCACAAATGCTAAAGAGCTGTCTTCCAAGGGAG

---
